# Supplementary material
Source: Copernicus journal article supplement (doi:10.5194/egusphere-2026-1472)
Supplement: Supplementary file [file egusphere-2026-1472-RC1-supplement.pdf]

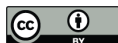

## Methanethiol and dimethyl sulfide measurements in seawater and the atmosphere around the Antarctic Peninsula and in the Weddell Sea

Charel Wohl<sup>\*1,2,3</sup>, Leah R. Williams<sup>\*4</sup>, Elisabeth Deschaseaux<sup>1</sup>, Lauriane L. J. Quéléver<sup>5</sup>, David C. S. Beddows<sup>6</sup>, Harald Stark<sup>4</sup>, Veronika Pospisilova<sup>7</sup>, Felipe Lopez-Hilfiker<sup>7</sup>, Guillaume Chamba<sup>8</sup>, Karine Sellegri<sup>8</sup>, Elisabet L. Sà<sup>1</sup>, Queralt Güell-Bujons<sup>1</sup>, Magda Vila<sup>1</sup>, Yaiza M. Castillo<sup>1</sup>, Arianna Rocchi<sup>1</sup>, Ana Sotomayor<sup>1,9</sup>, Dolors Vaqué<sup>1</sup>, Manuel Dall'Osto<sup>1</sup>, Elisa Berdalet<sup>1</sup>, Rafel Simó<sup>1</sup>

<sup>1</sup>Department of Marine Biology and Oceanography, Institut de Ciències del Mar (CSIC), Barcelona, Catalonia, Spain.

<sup>2</sup>Centre of Ocean and Atmospheric Sciences, University of East Anglia, Norwich, UK.

<sup>3</sup>National Centre for Atmospheric Science, University of East Anglia, Norwich, UK

10 <sup>4</sup>Aerodyne Research, Billerica, MA USA

<sup>5</sup>Institute for Atmospheric and Earth System Research (INAR-Physics), University of Helsinki, Helsinki, Finland

<sup>6</sup>National Centre for Atmospheric Science, University of Birmingham, Birmingham, UK

<sup>7</sup>Tofwerk AG, Thun, Switzerland

<sup>8</sup>Laboratoire de Météorologie Physique, CNRS UMR 6016, Université Clermont Auvergne, Aubière, France

15 <sup>9</sup>Unitat de Tecnologia Marina (CSIC), Barcelona, Catalonia, Spain

\*These authors contributed equally to this work.

20 *Correspondence to:* Charel Wohl (c.wohl@uea.ac.uk), Rafel Simó ([rsimo@icm.csic.es](mailto:rsimo@icm.csic.es)) and Leah Williams ([williams@aerodyne.com](mailto:williams@aerodyne.com))

25 **Abstract.** Inclusion of methanethiol (MeSH) in global [chemistry–climate models](#) has shown that MeSH emissions increase SO<sub>2</sub>, particulate sulfate and aerosol cooling over the Southern Ocean. However, measurements in the Southern Ocean are sparse. In February and March 2023, we deployed three online high-resolution mass spectrometers to measure MeSH and dimethyl sulfide (DMS) in seawater (down to 100 m in depth) and air during a cruise on the west side of the Antarctic Peninsula and the Weddell Sea. MeSH concentrations in surface seawater (mean 0.56, range 0.12 to 1.9 nmol dm<sup>-3</sup>) were within the range previously reported  
30 for the polar and subpolar regions. Considering concurrent DMS concentrations (mean 1.6, range 0.45 to 11.3 nmol dm<sup>-3</sup>), MeSH represented 30 ± 7 % of the ocean's volatile methylated sulfur (VMS = DMS + MeSH). Depth profiles of MeSH showed higher concentrations in the euphotic layer. Sea to air fluxes of MeSH (mean 1.0, range 0 to 5.0 μmol m<sup>-2</sup> d<sup>-1</sup>) were comparable to those of DMS (mean 1.7, range -0.6 to 8.6 μmol m<sup>-2</sup> d<sup>-1</sup>). Ambient air MeSH (mean 15, range 1 to 60 pptv) was low and similar to other observations. Air DMS concentrations were about a factor of 10 higher than MeSH (mean 0.25, range 0.01 to 1.35 ppb) and there  
35 was excellent agreement between two different mass spectrometer instruments using different ionization chemistry. MeSH seawater concentrations, sea–air fluxes, and atmospheric mixing ratios displayed depletion during daytime. Overall, this dataset represents a useful resource for model integration and validation.

**Short Summary.** Methanethiol and dimethyl sulfide are precursors to aerosols, which cool the climate. Here we present  
40 measurements of these compounds in surface seawater and ambient air around the Antarctic Peninsula and the Weddell Sea, highlighting that a large fraction of volatile sulfur emissions from the ocean is biogenic methanethiol. This dataset presents some of the factors driving the variability of these compounds.



## 1 Introduction

The Southern Ocean is a region of rapid climatic change that impacts the regional ocean biogeochemistry (Henley et al., 2020) and  
45 biology (Petrou et al., 2016), which, in turn, elicit feedback impacts on climate. At the same time, the Southern Ocean is a region  
of consistent radiative model bias, where models underpredict the true amount of aerosol-related cooling due to cloud cover and  
radiation scattering (Mallet et al., 2023). This leads to large uncertainties in global climate models and local weather predictions  
(Fiddes et al., 2022). In particular, summertime measured aerosol concentrations are consistently higher than models suggest  
(Schmale et al., 2019). This could be due to an under representation in the models of natural marine aerosol forming processes  
50 (Mccoy et al., 2015), such as through sulfuric acid and methane sulfonic acid production from the oxidation of ocean-derived  
dimethyl sulfide (DMS, Hossain et al., 2024) or it could be due to missing formation pathways involving other species, such as  
organics, iodine or amines (He et al., 2025). Scaling of methanethiol (MeSH) to DMS, using in situ measurements, has shown that  
the sea–air flux of methanethiol (MeSH) makes a hitherto overlooked, substantial contribution to the Southern Ocean atmospheric  
sulfate burden (Tashmim et al., 2025), and subsequent chemistry–climate modelling suggests that the inclusion of MeSH emissions  
55 reduces a small proportion of this radiative bias (Wohl et al., 2024).

The distribution of MeSH in the surface ocean remains poorly described, largely due to a paucity of measurements, which hampers  
our understanding of the biogeochemical cycling of this compound. Dimethylsulfoniopropionate (DMSP) is the common precursor  
of MeSH and DMS (Kiene, 1996). DMSP is produced in the surface ocean by plankton and enhanced under specific settings of  
60 community composition and environmental conditions (Hopkins et al., 2023). DMSP is released mainly by the mortality of  
phytoplankton cells, especially during viral lysis or sloppy grazing by zooplankton (Archer et al., 2002; Stefels et al., 2007). Once  
in the water column, bacteria rapidly take up DMSP and either assimilate its sulfur into proteins (Kiene et al., 1999), with  
intermediate production and leakage of MeSH, or break it down into DMS (Hopkins et al., 2023; Wohl et al., 2023a; Sun et al.,  
2016; Bürgmann et al., 2007). Studies have shown that the microbial switch (Simó, 2001) gives rise to variable proportions of  
65 DMS or MeSH as intermediate or final products of DMSP catabolism, and have suggested that DMSP availability relative to  
bacterial sulfur demands for growth act as the main driver for this variability (Kiene et al., 2000). Genetic studies (Landa et al.,  
2019; Hopkins et al., 2023) and experiments with radiolabelled DMSP (Kiene and Linn, 2000) have shown that the route through  
MeSH dominates bacterial DMSP catabolism over most of the ocean. On the other hand, many high DMSP-producing  
phytoplankton, notably dinoflagellates and haptophytes (including bloom-forming polar species of *Phaeocystis*), (Schoemann et  
70 al., 2005; Vaqué et al., 2025) preferentially cleave DMSP into DMS (Hopkins et al., 2023).

The largest sink for MeSH and DMS in the surface ocean is thought to be biological consumption by bacteria, giving MeSH a  
lifetime in the surface ocean on the order of hours (Kiene and Linn, 2000), compared to 0.5–2 days for DMS (Galí and Simó,  
2015). Some of the DMSP, DMS and MeSH produced in the euphotic zone sink down into the water column, where it is thought  
75 to be consumed by bacteria (Teng et al., 2021; Wohl et al., 2022). The abiotic sinks for MeSH are poorly understood. MeSH has  
been shown to be photochemically degraded, possibly into carbonyl sulfide (OCS) (Flöck and Andreae, 1996; Ulshöfer et al.,  
1996). Additionally, fast reactions with dissolved organic matter (Kiene, 1996) and chelation with dissolved metals (Björklund  
et al., 2019) represent hitherto unquantified sinks for MeSH in the surface ocean and throughout the water column. Due to fast  
biological incorporation and the abiotic losses, surface ocean dissolved MeSH concentrations are generally lower than those of  
80 DMS, although episodes of MeSH dominating the volatile methylated sulfur pool have been observed (Deschaseaux et al., 2025;  
Gros et al., 2023; Kettle et al., 2001; Kiene et al., 2021).



A small fraction of MeSH and DMS produced in the surface ocean is ventilated to the atmosphere as a function primarily of wind speed. Once in the air, DMS is largely oxidised by the day time oxidant radical OH (Fung et al., 2022). The reaction of MeSH with OH is 2–5 times faster than that of DMS (Lawson et al., 2020; Novak et al., 2022), contributing to the generally lower abundance of MeSH in the atmosphere, compared to DMS. MeSH is oxidized in several steps into SO<sub>2</sub> while DMS is oxidized into SO<sub>2</sub> and methanesulfonic acid (Novak et al., 2022; Jacob et al., 2024). The final oxidation products of DMS and MeSH, namely sulfuric acid and methanesulfonic acid, could lead to new particle formation and particle growth. These particles contribute to the cloud condensation nuclei (CCN) budget and therefore ultimately impact aerosol-related cooling globally and especially over the remote Southern Ocean where background aerosol concentrations are low and episodically high biological productivity provides a strong marine sulfur source (Hodshire et al., 2019).

Here we present measurements of MeSH and DMS in surface seawater, along the water column down to 100 m, and in ambient air around the Antarctic Peninsula and in the northern Weddell Sea. Using measurements in air and water, we calculate two-layer sea–air fluxes. We explore the potential links between the MeSH and DMS distribution patterns and our observations of concurrent biological and biogeochemical measurements. A better understanding of the factors influencing MeSH and DMS in this region will foster a process-based understanding of their cycling and more informed predictions of how their emissions will evolve in a changing climate. The concentration and emission patterns described here are also useful resources for chemistry–climate models that should attempt to fix radiative biases in this climate-relevant region.

## 2 Measurements

### 2.1 Cruise overview

The POLAR-CHANGE (Aerosol Emissions from POLAR CHANGing Environments) cruise was conducted on board the BIO *Hespérides* (A33) from the 14 February to 17 March 2023. Figure 1 shows the ship track below 60° S. The vessel serviced research bases in the South Shetland Islands before commencing a transect southwards on the western side of the Antarctic Peninsula. It traversed the Gerlache Strait and chose a more open ocean pathway south of 65° to arrive at Rothera Research station on Adelaide Island. From there, the vessel retraced its pathway northwards to go via Esperanza (Hope) Bay to the Weddell Sea. Then it traversed among multiple ice floes to encounter floating ice strips detached from the sea ice edge of the Weddell Sea during a record low sea ice year in 2023. Multiple Conductivity Temperature Depth (CTD) profiles were carried out in the northern Weddell Sea, the locations of which are indicated in Figure 1. The ship then carried out a transect partway towards the South Orkney Islands and back to Marambio Island where it remained until the end of sampling.

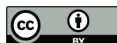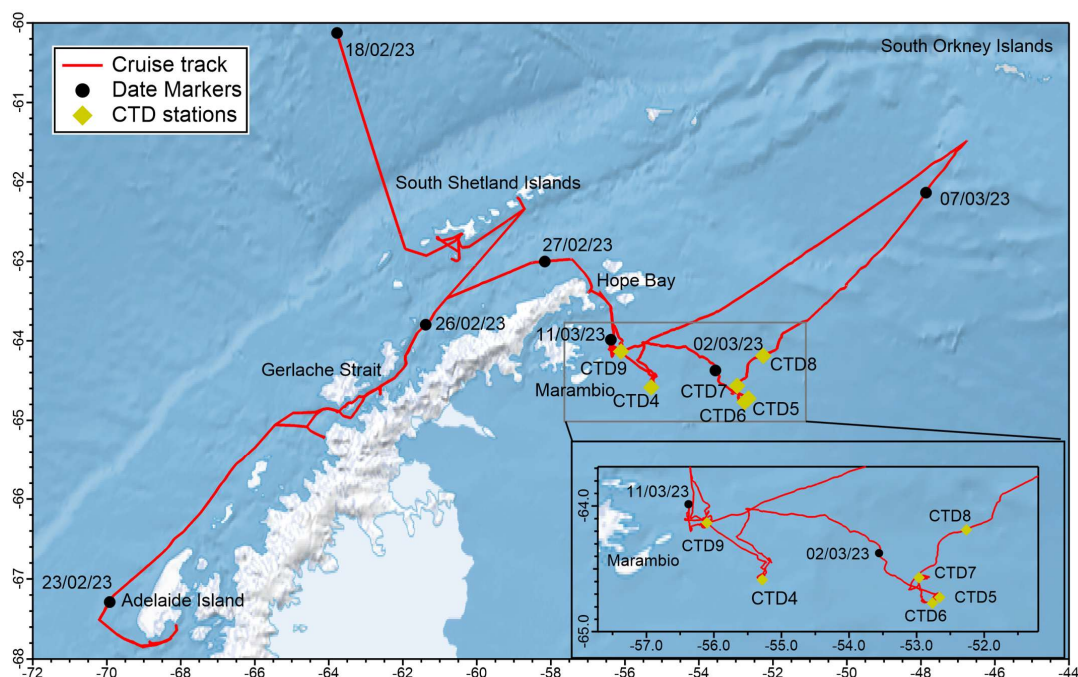

**Figure 1.** Map showing the cruise track in red along with date markers and the locations of the CTD samples discussed in this paper. The box shows an expanded view of the Weddell Sea.

- 115 Sea surface temperature (SST, °C) and sea surface salinity (SSS,  $\text{g dm}^{-3}$ ) were measured every 5 s in seawater from the underway water inlet of the ship located at 4 m depth (Figure 2a). Measurements are averaged to 1 hour in Fig. 2a. There was good agreement between the underway SST and SSS and the CTD sensors (SeaBird SB21), confirming that the underway sensors were well calibrated. Bathymetry data (Fig. 2b) were obtained by matching measurement coordinates with the General Bathymetric Chart of the Oceans ([https://gebcoc.org/data\\_and\\_products/gridded\\_bathymetry\\_data/](https://gebcoc.org/data_and_products/gridded_bathymetry_data/); GEBCO\_2023 sub ice topo, last accessed June 2025).
- 120 Underway seawater chlorophyll related fluorescence was measured every 5 s and is averaged to 1 hour in Fig. 2c. The fluorescence measurements were calibrated for total chlorophyll *a* (Chl *a*) concentration by frequent (every six hours, using only nighttime data) discrete measurements of Chl *a* extracted in acetone using the onboard Turner 10AU fluorometer, calibrated with a spinach derived chlorophyll standard (Sigma C5357) and verified with a Beckton–Dickinson spectrophotometer (Figure 2c). We also simultaneously measured Chl *a* concentration in seawater samples passed through a 3  $\mu\text{m}$  filter, to estimate the contribution of the
- 125 smallest size photosynthetic organisms ( $<3\mu\text{m}$ ).

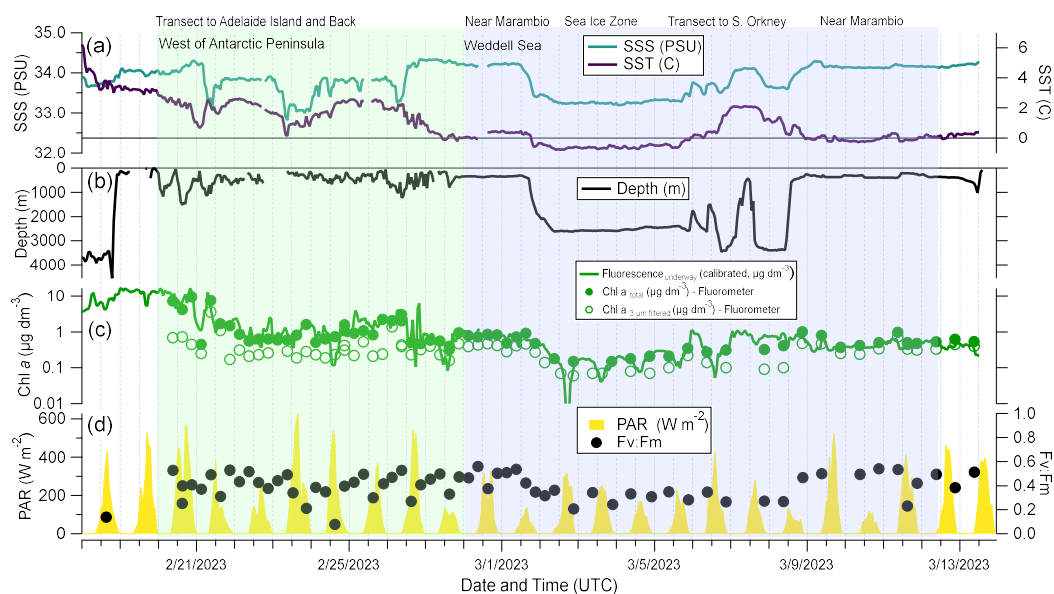

**Figure 2** (a) Underway surface seawater salinity (SSS) and temperature (SST), (b) sea depth, (c) underway surface seawater fluorescence calibrated to the discrete fluorometer measurements of total Chl *a*, and the Chl *a* concentration in the < 3  $\mu\text{m}$  size fraction plotted on a log scale, and (d) photosynthetic active radiation (PAR) and Fv:Fm. Green shaded area indicates when the ship was west of the Antarctic Peninsula and blue shaded area indicates when the ship was in the Weddell Sea.

130

## 2.2 Biological measurements

Biological and biogeochemical measurements were conducted every six hours over most of the cruise at 06:00, 12:00, 18:00 and 24:00 local time. A brief overview of the methodology is presented here while extensive details are given in Rocchi et al. (2025). Seawater samples (2.0  $\text{cm}^3$ ) were collected from the underway water inlet, preserved with 1 % paraformaldehyde plus 0.05 % glutaraldehyde for bacterial abundance analyses, and stored at -80 C until analysis at the ICM-CSIC within 5 months. Bacterial, pico- and nanophytoplankton abundances were measured on a CyFlow Cube 8 flow cytometer (Sysmex). Photochemical efficiency of photosystem II (Fv:Fm) was measured on board using a Mini-FIRe fast repetition fluorometer (Gorburnov et al., 2020). Seawater samples for this analysis were collected into a 25  $\text{cm}^3$  quartz cuvette and analysed immediately, without dark acclimation.

135

140

Total DMSP (DMSP<sub>t</sub>) samples were collected unfiltered from the underway seawater inlet in ~30 ml borosilicate serum vials. Following Kinsey and Kieber (2016), the uncapped vials were individually heated by microwave until they began to boil. After the first bubble formed, the microwave was stopped and the vial was left to cool. Subsequently, 30  $\mu\text{l}$  of 37 % HCl (Analytical Grade) were added to each vial to remove the DMS present and preserve the DMSP. Acidified samples were stored at room temperature in the dark. Within six months after the cruise, DMSP<sub>t</sub> was converted to DMS by alkaline hydrolysis with NaOH for at least 24 hours. The resulting DMS was quantified with a cryogenic purge and trap system coupled to a Thermo Fisher TRACE 1300 gas chromatograph with flame photometric detection following Masdeu-Navarro et al. (2022).

145

## 2.3 Seawater MeSH and DMS measurements

Seawater concentrations of MeSH and DMS were measured with a Vocus PTR (Aerodyne Research/Tofwerk AG, SN P4Q-188) installed in one of the laboratories in the hull of the ship with access to an underway seawater tap and have been reported previously



150 in Wohl et al. (2024). Here we report updated analysis and additional measurements of depth profiles. A segmented flow coil  
equilibrator (SFCE) (Wohl et al., 2019) was used to extract gases from seawater into zero air carrier gas (generated by a Pt catalyst  
zero air generator, Tofwerk AG) which was then measured by the Vocus PTR. As in previous deployments of the SFCE (e.g.,  
Wohl et al., 2023b), for underway sampling the inlet of the equilibrator was used to draw seawater from the underway tap via the  
bottom of a slightly overflowing glass bottle. For discrete samples (e.g., from the CTD), the SFCE sampled from the bottom of a  
155 500 cm<sup>3</sup> bottle. Further details on cruise specific operation, calibrations and calculating dissolved concentrations are provided in  
the Supplement (Sects. S1–S2).

Seawater MeSH concentrations are not reported for the first part of the cruise due to bacterial growth in the SFCE causing  
unrealistically high concentrations (see Sect. S3). This issue was dealt with by daily rinsing of the tubing with 3.7% HCl.  
160 Thereafter, we checked for bacterial growth in the underway seawater supply by comparisons to concentrations measured in the 5  
m Niskin bottle from the CTD casts and could not find a significant difference (see Sect. S4).

#### 2.4 Ambient air MeSH and DMS measurements

Gas-phase concentrations of MeSH and DMS were measured with a Vocus PTR (Aerodyne Research/Tofwerk AG, SN P4Q-171)  
installed in the cabin of the chief scientist, located just under the bridge of the BIO *Hespérides*. A hole was bored through the wall  
165 facing the bow (front) at about 12 m above the sea surface. A downward facing 90° bent metal tube was mounted on the outside  
to prevent sea spray and precipitation entering the room. A main sampling line of 1.3 cm outer diameter (OD) PFA tubing was  
passed through the metal tube to sample outside air. The main sampling line carried a sample flow of 14 dm<sup>3</sup> min<sup>-1</sup>. After 1.5 m,  
the main sampling line was split in two, with 8 dm<sup>3</sup> min<sup>-1</sup> flowing through a 0.95 cm OD, 1.1 m long PFA line to the Vocus PTR.  
The Vocus PTR subsampled 250 cm<sup>3</sup> min<sup>-1</sup> through a 250-micrometer inner diameter (ID) capillary. The estimated residence time  
170 in the sampling line was 0.7 s and flow was close to laminar. Calibrations with a standard gas mixture containing DMS were  
performed every four hours with zeros using a Pt catalyst zero air generator (Tofwerk AG) before and after each calibration.  
Calibration for MeSH using a perm tube was performed after the campaign. Data was acquired at 1 Hz and averaged to 1 minute  
before being analysed with Tofware 4.0.2. Due to the low ambient concentrations of DMS and MeSH, careful peak fitting was  
required to remove interferences from background compounds at nominal m/Q 49 and 63. Further details on the analysis are  
175 provided in the Supplement (Sect. S5).

Gas-phase DMS was also measured with the benzene cation channel of a fast polarity switching high-resolution time-of-flight  
chemical ionization mass spectrometer (Vocus B, Aerodyne Research, SN P4B-002) (Aggarwal et al., 2025; Chang et al., 2026).  
The Vocus B switches every 0.5 s between two different polarity mass spectrometers and between two different vacuum ultraviolet  
180 (VUV) ion sources, one generating benzene cations and iodide anions and the other generating acetone cations and O<sub>2</sub> anions. At  
the split in the main sampling line, a 1.3 cm OD, 0.1 m long PFA tube carried 6 dm<sup>3</sup> min<sup>-1</sup> to the Vocus B inlet. The Vocus B  
subsampled 1.5 dm<sup>3</sup> min<sup>-1</sup> through a 0.5 mm pinhole into the Adduct Ionization Mechanism (AIM) reactor held at 90 mbar (± 5  
mbar). The inlet was zeroed every 4 hours with dry gas from a nitrogen generator (LNI). Calibration for DMS was performed after  
the campaign using the same calibration gas as for the Vocus PTR. The calibrations were conducted over a range of AIM reactor  
185 pressures and over a range of relative humidities (RH) and used to correct the data for changes in sensitivity due to changes in  
pressure and water concentration. In particular, the difference in sensitivity between the dry zeros and the ambient measurements  
(RH 46 to 100 %) needed to be accounted for in the calibrations. The data was acquired at 0.5 Hz and averaged to 1 minute before  
being analysed with Tofware 4.0.2. We were not able to detect MeSH with the Vocus B.



190 Gas-phase ambient concentrations of MeSH and DMS were additionally measured with a quadrupole PTR (Ionicon) as part of experiments with two Air-Sea Interface Tanks (ASITs) located on a rear deck. These measurements are described in detail in Chandra et al. (2026).

### 2.5 Calculations of sea-air flux

Sea-air fluxes were calculated using the two layer model (Liss and Slater, 1974) with the equation

195 
$$Flux = K_w(C_w - C_a H)0.24 \quad (1)$$

where  $Flux$  ( $\mu\text{mol m}^{-2} \text{d}^{-1}$ ) is the sea-air flux,  $K_w$  ( $\text{cm hr}^{-1}$ ) is the total transfer velocity from the sea to the air,  $C_w$  ( $\text{nmol dm}^{-3}$ ) is the concentration in the seawater,  $C_a$  ( $\text{nmol dm}^{-3}$ ) is the concentration in air and  $H$  is the unitless Henry's law solubility for water over air. The solubilities for DMS and MeSH are from Sander (2023), scaled to measured seawater temperature and salinity. The factor of 0.24 converts the units on the right-hand side of the equation to the units on the left-hand side.  $K_w$  is calculated as

200 
$$K_w = \left[ \frac{1}{k_w} + \frac{H}{k_a} \right]^{-1} \quad (2)$$

where  $k_w$  ( $\text{cm hr}^{-1}$ ) is the water side transfer velocity,  $k_a$  ( $\text{cm hr}^{-1}$ ) is the air side transfer velocity.  $k_w$  is a function primarily of windspeed and secondarily of the waterside Schmidt number which is in turn a function of SST and diffusivity.  $k_w$  is calculated from

$$k_w = k_{660} \left( \frac{Sc}{660} \right)^{0.5}$$

205 where  $k_{660}$  is  $k_w$  at a Schmidt number ( $Sc$ ) of 660 and is based on a linear fit to data for DMS versus windspeed over the Southern Ocean presented in Table 2 of Yang et al. (2011) with  $k_{660}$  set equal to 1.1 for windspeeds less than 2  $\text{m s}^{-1}$ . The Schmidt number for DMS is calculated as in Wanninkhof (2014). The Schmidt number for MeSH is calculated with the supplementary R code provided in Johnson (2010). The air side transfer velocity ( $k_a$ ) is calculated using the parametrisation by Yang et al. (2013b), where the friction velocity was calculated as per Johnson (2010). Apparent wind speed ( $\text{m s}^{-1}$ ) was measured on the BIO *Hespérides* at a height of 27.3 m and converted to true wind speed (TWS,  $\text{m s}^{-1}$ ) using the data for ship speed and direction. TWS was converted to a height of 10 m using the equation in Hsu et al. (1994). Despite the vessel spending some time in the sea ice zone of the Weddell Sea, we did not explicitly account for suppression of gas transfer due to sea ice because sea ice cover was generally less than 15 %.



### 3 Results and Discussion

#### 215 3.1 Seawater concentrations of MeSH and DMS

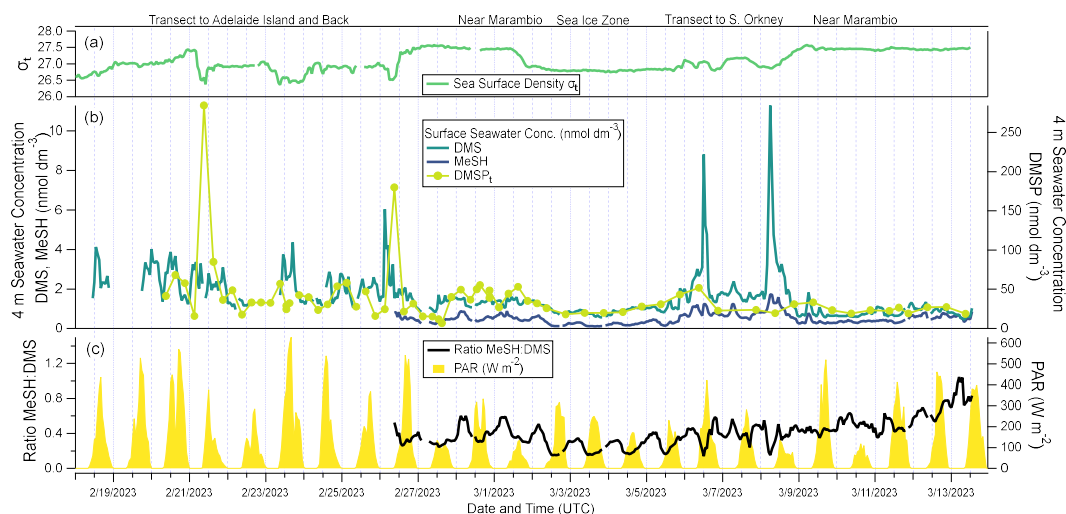

**Figure 3.** (a) Sea surface density, (b) surface seawater concentrations of MeSH, DMS, and DMSPt and (c) the ratio of MeSH:DMS from the continuous underway seawater inlet. PAR is also shown in (b).

Figure 3 shows underway (4 m) seawater DMS and MeSH concentrations averaged to 1 hour. DMS concentrations ranged from 0.45 to 11.3 nmol dm<sup>-3</sup>, with an average of 1.6 nmol dm<sup>-3</sup>, which are similar to previous measurements in the region at this time of the year (Wohl et al., 2020; Zhang et al., 2020) and close to the climatological range for March (1–3 nmol dm<sup>-3</sup>; Hulswar et al., (2022)). Higher DMS concentrations are typically observed earlier in the season (December to early February; Hulswar et al., (2022)). As in previous studies (e.g., Webb et al., 2019), we observed a few localized episodes of much higher than average hourly DMS concentrations (>8 nmol dm<sup>-3</sup>). Additional statistics such as median, 25<sup>th</sup> percentile and 75<sup>th</sup> percentile are given in Table S1 for all of the measurements presented here.

The hourly seawater MeSH concentrations ranged from 0.11 to 1.7 nmol dm<sup>-3</sup>, with an average of 0.5 nmol dm<sup>-3</sup>, though this measurement has an estimated uncertainty of ± 30% (see Sect. S2). Despite the large uncertainty, this average concentration was higher than average measurements across the Atlantic (0.39 nmol dm<sup>-3</sup>, Kettle et al. (2001)), in the Mediterranean coast (0.3 nmol dm<sup>-3</sup>, Wohl and Simó (2024)) and in the Great Barrier Reef (mean 0.49 in 2021 and 0.34 nmol dm<sup>-3</sup> in 2022, Deschaseaux et al. (2025)). These MeSH concentrations were lower than measurements in the Arctic (2.96 nmol dm<sup>-3</sup> for polar water Gros et al. (2023)) and similar to the sub-Arctic (0.57 nmol dm<sup>-3</sup> average of cruise OC1607 and OC1708, Kiene et al. (2021)), where episodes of higher than 1.5 nmol dm<sup>-3</sup> MeSH were also observed.

The mean seawater MeSH:DMS ratio was 0.41 (range 0.16 to 1.0), which was higher than in warmer ocean regions, where it has been reported to range from 0.05 to 0.3 (Deschaseaux et al., 2025; Kettle et al., 2001; Gros et al., 2023; Wohl and Simó, 2024). Expressed as a percentage of volatile methylated sulfur (VMS=MeSH + DMS), MeSH represents a substantial (28 ± 8 %) portion of the surface ocean VMS in Antarctic waters in late summer. Between 6 March and 8 March 2023, during the transect towards the South Orkney Islands, two brief episodes were encountered of high seawater DMS where concentrations increased by ten times



240 with respect to the background levels to reach 8.8 and 11.3 nmol dm<sup>-3</sup>. During these two episodes, seawater MeSH concentrations also increased but only by factors of 1.5–3. In other words, there was episodic decoupling between the two compounds, where large DMS increases were not accompanied by proportional increases in MeSH. The lowest seawater MeSH concentrations (~ 0.3 nmol dm<sup>-3</sup>) and MeSH:DMS ratios (<0.4) were observed between 2 March and 5 March in the Weddell Sea near sea ice floes, in agreement with lower MeSH concentrations encountered previously near the sea ice in the Arctic (Gros et al., 2023). These 245 commonalities suggest conditions of lower MeSH production (or enhanced MeSH loss) in low productivity waters near sea ice in polar regions.

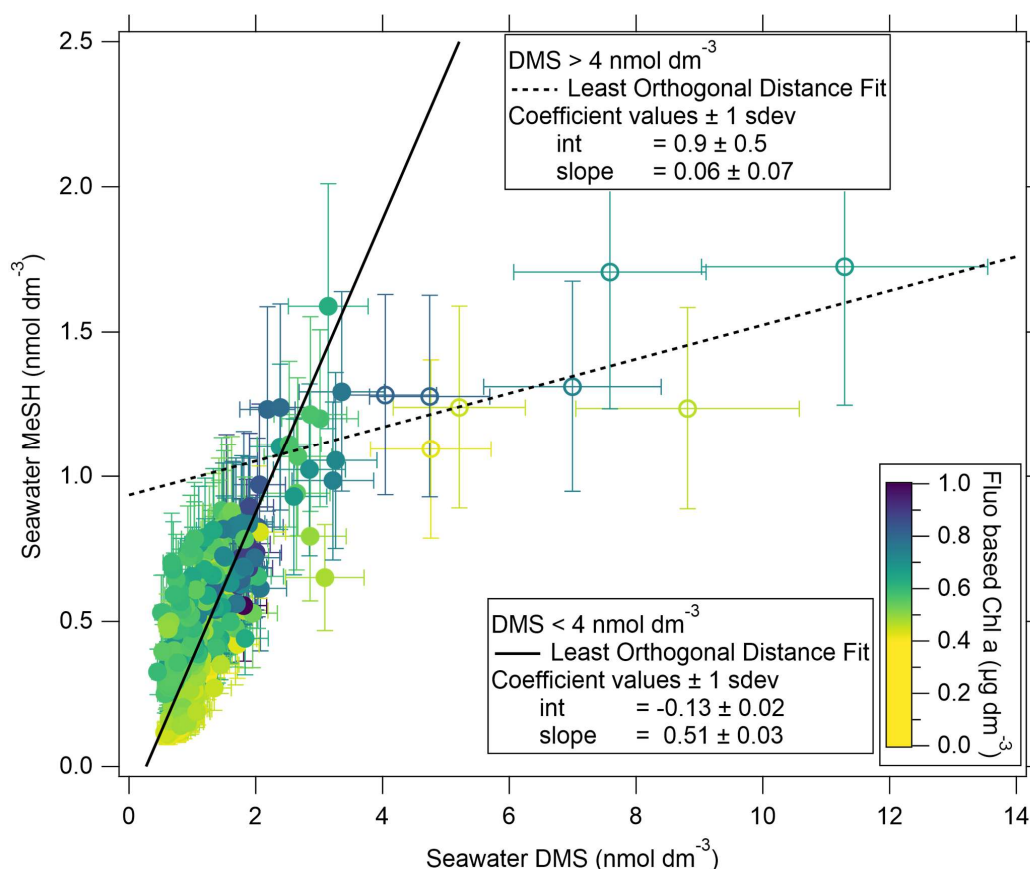

Figure 4. Scatter plot of seawater MeSH vs seawater DMS, coloured by Chl *a*.

250 Figure 4 shows seawater MeSH plotted against seawater DMS with the points colored by Chl *a* (from the continuous fluorescence-based measurement). The error bars indicate the estimated uncertainty of ± 20% in DMS and ± 30% in MeSH (see Sect. S2). The regression between the two compounds displays different behaviour at higher and lower DMS concentrations. Focussing on data collected at lower DMS concentrations (< 4 nmol dm<sup>-3</sup>), the two compounds are positively correlated with a Pearson *r* of 0.8. This tight correlation between MeSH and DMS in surface seawater for the majority of the measurement points (98 % of the points in 255 Fig. 4 have less than 4 nmol dm<sup>-3</sup> DMS) suggests that the sources and sinks of these two compounds are tightly coupled and similarly balanced. Since the dominant known source of MeSH in surface seawater is bacterial DMSP demethylation (Kiene and



Linn, 2000), and that of DMS is algal and bacterial DMSP cleavage (Hopkins et al., 2023)(Kiene and Linn, 2000), this result suggests that the biological community dominating the Southern Ocean and Weddell Sea at the time of sampling was capable of undertaking both DMSP degradation pathways.

260

### 3.2 Depth profiles of MeSH and DMS

Figure 5 shows averaged depth profiles of MeSH and DMS taken during 6 CTD casts between 28 February and 9 March in the Weddell Sea. Two of the CTD casts (CTD 4 and 9) were taken at 9:00–10:00 solar time (approximately 4 hours after sunrise), while the other four casts (CTD 5–8) were taken at 17:00–18:00 solar time (approximately 1 hour before sunset). The mid-morning casts may represent the accumulated conditions over the night, while the late afternoon casts represent accumulated conditions during the day. This grouping of the CTD casts also splits them by location, as the morning casts were closer to land and with no ice present, while the afternoon casts were located in the Weddell Sea near sea ice floes.

265

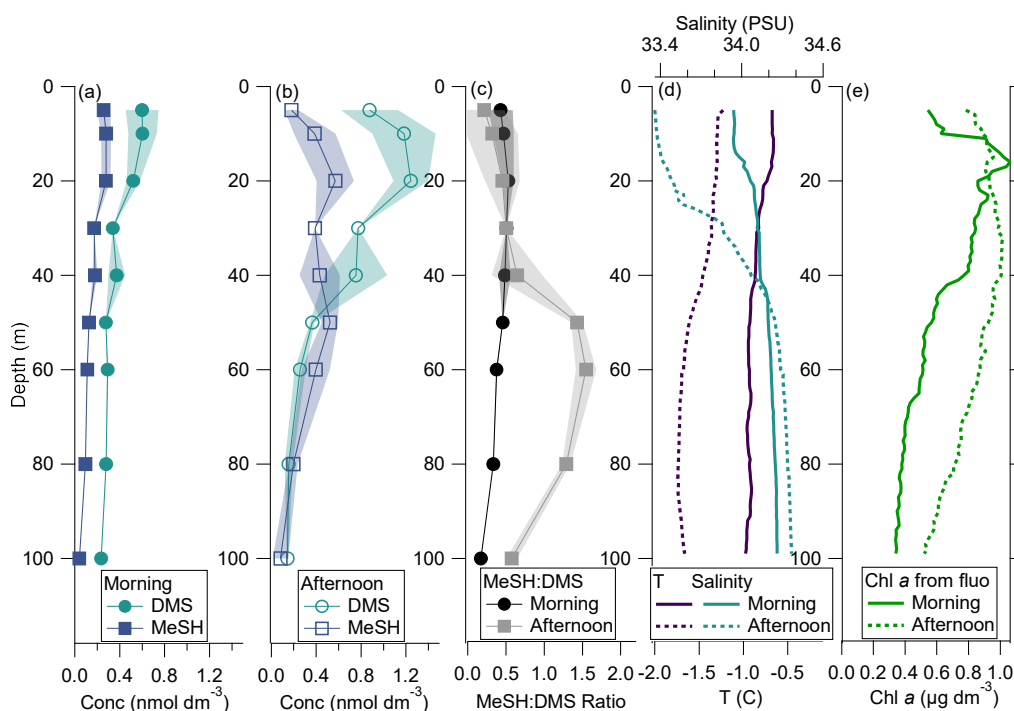

270 **Figure 5.** Averaged vertical profiles of MeSH and DMS in seawater, grouped by (a) mid-morning and (b) late afternoon casts, with the ratio indicated in panel (c). Shaded areas in the mid-morning casts illustrate range (N=2), while they illustrate standard deviation in the late afternoon casts (N=4). Shaded areas in (c) are the propagated uncertainty in the ratio. (d) Salinity and temperature for mid-morning and late afternoon casts. (e) Chl a from fluorescence for mid-morning and late afternoon casts,

The mid-morning casts showed more uniform MeSH and DMS concentrations in the 25 m near the surface with a ratio that is similar to the campaign average of about 0.4. Below 25 m, concentrations were lower and gradually decreased to near zero at 100 m depth. The late afternoon casts showed on average higher maximum concentrations of both compounds, which also decreased sharply below 25 m. Higher concentrations in sunlit waters are in line with previous observations in the Southern Ocean which generally show more DMS near the surface than at depth (Jones et al., 1998; Li et al., 2024; Rellinger et al., 2009), as light enhances

275



biological production over abiotic consumption (Galí and Simó, 2015). The fact that MeSH exhibited the same pattern supports a dominant biological net source for MeSH too. One of the most prominent differences between the mid-morning and late afternoon casts is the notable depletion of both compounds near the surface in the latter (Fig. 5b). Despite the fact that exposure to high sunlight favours gross DMS production (Galí et al., 2011), depletion of surface DMS concentrations during the course of the day is a common feature, due to fast photochemical loss in the presence of fresh coloured dissolved organic matter or high nitrate concentrations (Yang et al., 2013a; Royer et al., 2016; Galí et al., 2023). MeSH is expected to behave similarly, as it is known to be sensitive to photochemical oxidation (Flöck and Andreae, 1996). The MeSH:DMS ratio near the surface is slightly smaller in the afternoon casts, suggesting that photochemical loss is faster for MeSH. Another difference between the mid-morning and late afternoon casts is the profiles of MeSH and DMS below 40 m. While in the mid-morning MeSH paralleled DMS in their slow decrease to the deep (Fig. 5a), in the late afternoon MeSH increased again around 60 m while DMS steadily decreased (Fig. 5b). As a result, the MeSH:DMS ratio increased below 40 m during the day and reached values well above 1 at 50–80 m (Fig. 5c). These depths correspond to the deeper part of the high Chl *a* fluorescence region of the water column (Fig. 5c), suggesting that either DMSP degradation is more geared to MeSH production in high Chl *a* –low light waters, i.e., is dominated by bacterial activity on sinking or decaying phytoplankton, or MeSH loss decreases substantially in low light, or both. Below 70–80 m (i.e., below the pycnocline), both DMS and MeSH concentrations were lower because the lack of light prevented phytoplankton growth and DMSP production, and bacterial consumption and convection drove the loss of sinking compounds.

### 3.3 Air concentrations of MeSH and DMS

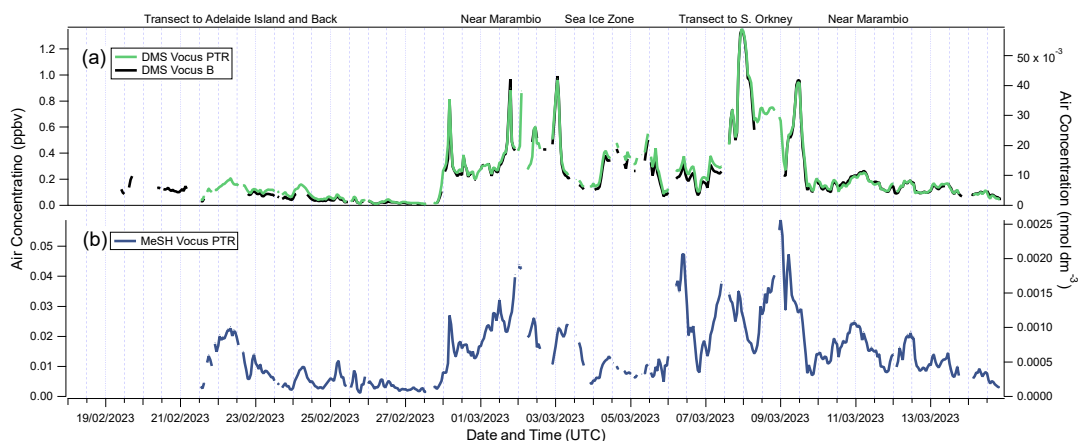

295

**Figure 6.** Air concentrations of (a) DMS measured with Vocus PTR and Vocus B and (b) MeSH measured with Vocus PTR. Hourly measurements of the air concentration of DMS and MeSH are shown in Fig. 6. Mean DMS ambient air concentration measured with the Vocus PTR was 0.25 ppbv (0.011 nmol dm<sup>-3</sup>) with a range of 0.008 to 1.35 ppbv (0.0004 to 0.059 nmol dm<sup>-3</sup>). DMS measured with the Vocus B was within ± 10% of the Vocus PTR measurement (see Appendix A). These ambient air mixing concentrations are typical for DMS over the Southern Ocean (0.1 to 1 ppbv, Bhatti et al., 2023; Read et al., 2008; Wohl et al., 2020; Mynard et al., 2025). The mean MeSH ambient air concentration was 15 pptv (0.00063 nmol dm<sup>-3</sup>) with a range of 1 to 60 pptv (5 × 10<sup>-5</sup> to 0.0026 nmol dm<sup>-3</sup>). These MeSH air mixing ratios are similar to previous measurements in marine air of the North East Pacific (19.1 pptv, Novak et al., 2022), the eastern North Atlantic (15 pptv, Kilgour et al., 2024), the North Sea (15.7 pptv, Wohl et al., 2025), the southwest Pacific Ocean (18 pptv, Lawson et al., 2020) and the Southwest Pacific Ocean east of New Zealand (40 pptv, Rocco et al., 2025). Our measurements are within the range of MeSH observations over the Southern Ocean

305



near the sea ice edge binned by latitude between 62° and 66° S (medians 14–64 ppt, Mynard et al., 2025). Measurements of DMS and MeSH with the Vocus PTR were in reasonable agreement with the measurements from the Quad PTR (see Sect. S6).

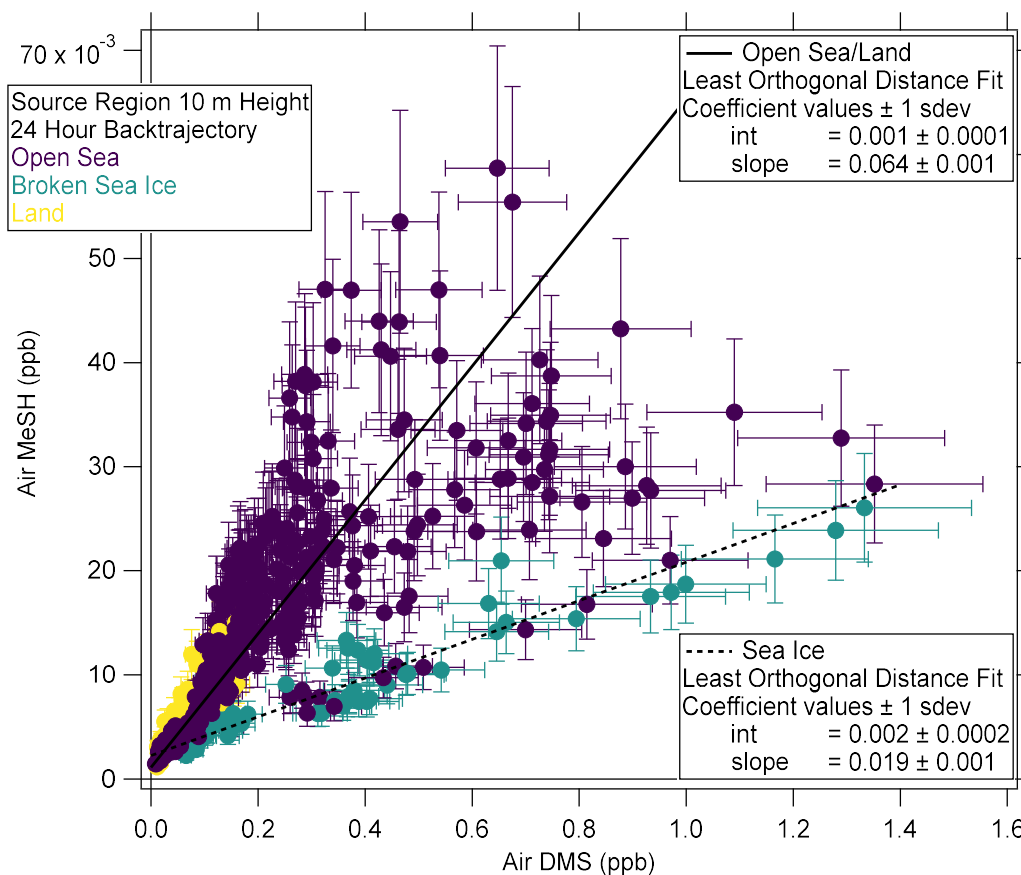

310 **Figure 7.** Scatter plot of the air concentration of MeSH vs the air concentration of DMS. Colour indicates 24 hour backtrajectory passing over open sea, sea ice (<50%) or land.

Figure 7 shows the scatter plot of air MeSH vs air DMS coloured by source region of the 24-hour backtrajectory at an arrival height of 10 m. When the backtrajectories pass over open sea or land, MeSH and DMS are positively correlated with a Pearson  $r = 0.7$ .  
 315 The slope of a least orthogonal distance fit is 0.064, corresponding to an MeSH:DMS ratio of roughly 1:15. This significantly lower ratio than in seawater (roughly 1:2.5) is explained by the fact that MeSH reacts 2–5 times faster than DMS with the most common daytime atmospheric oxidant, OH (Lawson et al., 2020; Novak et al., 2022). In contrast, when backtrajectories pass over broken sea ice (sea ice concentration < 50%), DMS is much higher relative to MeSH with a slope of 0.019, corresponding to an MeSH:DMS ratio of about 1:50. Mynard et al. (2025, Fig. 3h) also observe a more variable MeSH:DMS ratio in air when air  
 320 masses originated from a mixture of open ocean, Antarctic continent and the ice edge. Only a few of the timepoints with high air DMS concentration correspond to times with high sea DMS concentration. Thus, the air DMS concentration is impacted both by local flux and by transport, more so than the air MeSH concentration with its shorter lifetime.



### 3.4 Sea-to-air fluxes

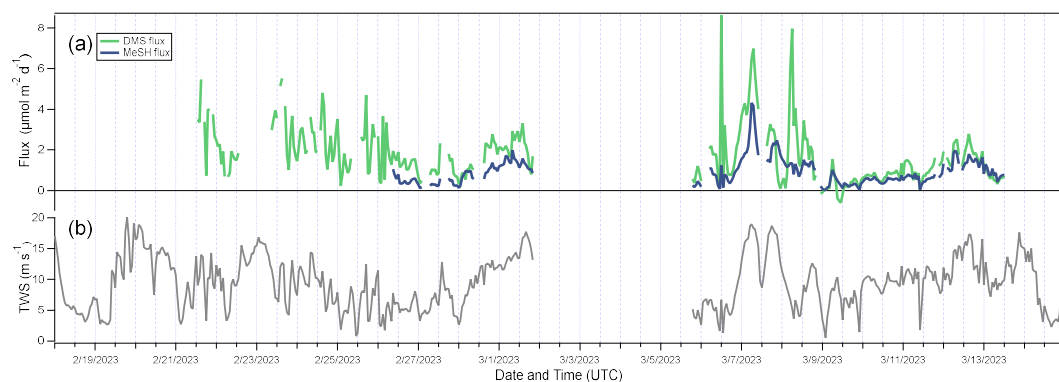

325

**Figure 8. (a) Sea to air fluxes of DMS and MeSH, and (b) true wind speed (TWS, relative to ground).**

Calculated two-layer fluxes of MeSH and DMS are presented in Fig. 8, along with the true wind speed. The gap between 01 March and 05 March is due to a failure of the wind sensor. The mean MeSH sea–air flux was  $0.9 \mu\text{mol m}^{-2} \text{d}^{-1}$  with a range of 0.0 to  $4.3 \mu\text{mol m}^{-2} \text{d}^{-1}$  and the mean DMS flux was  $1.7 \mu\text{mol m}^{-2} \text{d}^{-1}$  with a range of  $-0.6$  to  $8.6 \mu\text{mol m}^{-2} \text{d}^{-1}$  (or mean  $1.5 \mu\text{mol m}^{-2} \text{d}^{-1}$  for the time period with both MeSH and DMS flux measurements). The MeSH flux was within the range of previous measurements, including eddy covariance flux measurements in coastal temperate waters ( $0.74 \mu\text{mol m}^{-2} \text{d}^{-1}$  (Novak et al., 2022)), estimates from the nighttime accumulation technique ( $0.36 - 4.14 \mu\text{mol m}^{-2} \text{d}^{-1}$  (Rocco et al., 2025)), and two-layer fluxes calculated using air and seawater measurements in the Great Barrier Reef ( $1.2 \mu\text{mol m}^{-2} \text{d}^{-1}$  (Deschaseaux et al., 2025)). Our DMS fluxes were somewhat lower than previous measurements in the Southern Ocean, reported to be mostly between  $2.5$  and  $5.5 \mu\text{mol m}^{-2} \text{d}^{-1}$  (Wohl et al., 2020; Yang et al., 2011; Zhang et al., 2020), likely because we sampled after the DMS emission peak typically observed in December through early February (Hulswar et al., 2022).

Equation 1 shows that the flux is driven by two terms, the total transfer velocity ( $K_w$ ), mostly dependent on wind speed, and the difference between the sea water concentration ( $C_w$ ) and the air concentration times the solubility ( $C_aH$ ). The average dimensionless solubilities at ambient conditions during this cruise were similar for both compounds (20 for MeSH and 28 for DMS). For MeSH, the seawater concentration is on average 60 times larger than  $C_aH$ , meaning that the seawater was highly supersaturated with respect to the air and the driving force for exchange was always for sea to air transfer. In other words, the air concentrations were so low that they did not make a difference to the flux calculation. For DMS, the seawater concentration is on average 18 times larger than  $C_aH$ , meaning that the driving force was predominantly sea to air transfer too, although there was one short period on 09 March when the air concentration was high enough to drive net air to sea transfer.

345



### 3.6 Diel variability

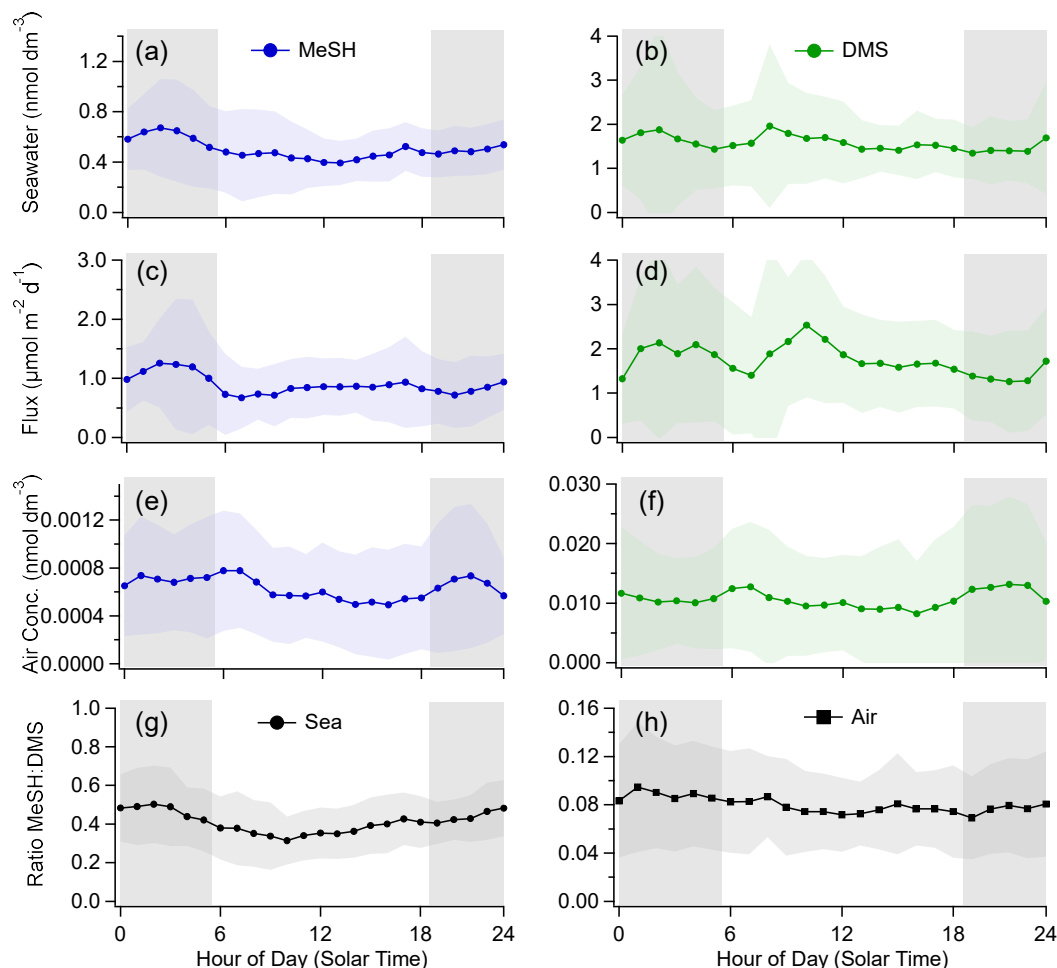

350 **Figure 9.** Diel changes in surface seawater concentration of (a) MeSH and (b) DMS, the sea–air flux of (c) MeSH and (d) DMS, the ambient air concentrations of (e) MeSH and (f) DMS and the changes in the MeSH:DMS ratio in (g) sea and (h) air. The points show the mean and the shaded areas show one standard deviation. Night time is indicated with the grey boxes.

We observed significant diel variability in surface seawater concentrations, sea–air fluxes, and ambient air mixing ratios of MeSH (Fig. 9). The mean MeSH seawater concentration during darkness (0.56 nmol dm<sup>-3</sup>) was significantly higher than the mean during daylight (0.45 nmol dm<sup>-3</sup>, P=0.0006, 2-tailed T Test, n=11 for dark and n=13 for light). Depleted seawater MeSH concentrations by about 20% during the day were consistent with the near surface depletion in depth profiles during the day (Fig. 5b), indicating either rapid photochemical loss (Flöck and Andreae, 1996; Ulshöfer et al., 1996) or an as yet unknown light driven decrease in microbial MeSH production or increase in consumption. The diel changes in MeSH were particularly pronounced while the ship was sampling near sea ice in the Weddell Sea between 02 and 05 March (Figure 3). These were the least productive (lowest Chl *a* concentrations) hence clearest waters of the cruise. The night–day difference in the underway (in vivo) fluorescence, and the low level of photosynthetic efficiency as depicted by the Fv:Fm ratio (Figure 2) also suggest that phytoplankton were particularly light

355  
360

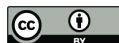

stressed in this area during the day, supporting the notion of clearer waters and more exposure to solar radiation. Diatom cultures indicate higher MeSH concentrations during periods of illumination (Kameyama et al., 2011; Padaki et al., 2025), suggesting higher production by the algal-bacterial coupling during the day. Similarly, on board incubations of bubbled seawater samples during a previous cruise found that daytime production rates of MeSH are possibly higher than at night (Davie-Martin et al., 2020). However, in our field observations, consistent daytime MeSH depletion suggests that UV exposure and photo-oxidation may have controlled the MeSH concentration near the surface.

We did not observe a significant diel change in surface seawater DMS concentrations over the entire cruise although the vertical profiles in the Weddell Sea showed near-surface depletion during the day. The diel variability in surface seawater DMS depends on a delicate balance between a range of biological sources and biotic and abiotic sinks, which are tightly coupled and highly dependent on season and location (e.g., Royer et al., 2016). Our current understanding is that DMS cycling rates display diurnal variability, with high solar radiation favouring gross biological DMS production (Archer et al., 2010; Kinsey et al., 2023; Galí et al., 2011) but also photochemical loss (Galí et al., 2013; Galí et al., 2023), processes that may balance out and lead to large, opposite, small or no substantial diel changes in DMS seawater concentrations (Royer et al., 2016). The mean MeSH:DMS ratio during darkness was 0.46, while during daylight hours it was 0.37, 20% lower and a diel change of similar magnitude to MeSH alone. Overall, the diel cycles of MeSH and DMS concentrations in surface seawater indicate that MeSH is more net sensitive to light than DMS. In any case, as has been done for DMS (e.g., Royer et al., 2016), high temporal resolution measurements and mechanistic studies assisted by modelling, are necessary to further elucidate what drives MeSH diel variability in seawater and how widespread it is.

The mean nighttime MeSH emission flux was  $1.0 \mu\text{mol m}^2 \text{d}^{-1}$  and decreased by 18% to  $0.82 \mu\text{mol m}^2 \text{d}^{-1}$  during daytime ( $P=0.017$ , 2-tailed T Test). Wind speed did not show any marked diel variation and MeSH was highly supersaturated in seawater throughout the cruise, implying that the diel changes in the sea–air flux were due to changes in seawater concentration alone. Conversely, the DMS flux did not show significant diel variability, which is consistent with the lack of a diel change in seawater DMS and in line with previous high-resolution measurements in the Southern Ocean (Wohl et al., 2020; Zhang et al., 2020).

The mean air MeSH concentration at night was  $0.00068 \text{ nmol dm}^{-3}$  (12.8 pptv), while the mean during daytime was  $0.00059 \text{ nmol dm}^{-3}$  (11.2 pptv). This is a 13 % decrease on average from night to day ( $P=0.0073$ ). The lowest MeSH concentrations were measured at solar zenith coinciding with the hours of highest OH concentrations. OH is thought to be the largest sink for MeSH in the remote pristine atmosphere (Novak et al., 2022). The few existing studies of MeSH in marine air report a diel change in the mixing ratio (e.g., Kilgour et al., 2024; Lawson et al., 2020; Novak et al., 2022; Wohl et al., 2025). However, we note that the diel variability of MeSH in air reported for this cruise is markedly smaller than the diel change observed at lower latitudes (typically about 15–30 pptv night to day difference). As also pointed out by Mynard et al. (2025), this is likely due to lower daytime OH concentrations at higher latitudes (Wolfe et al., 2019). MeSH reacts faster with OH than DMS does (Lawson et al., 2020; Novak et al., 2022) and, indeed, air DMS concentrations did not display a significant diel change. The invariance in atmospheric DMS indicated that diel changes in the boundary layer height were not behind the MeSH diel variation. Since the night–day change for air MeSH is a somewhat smaller relative decrease than for the seawater MeSH, the night–day change in emission flux may be a stronger driver of the air MeSH diel changes than the oxidation rates. All in all, this diel behaviour illustrates the complexity in modelling MeSH in the marine environment as difficulties in accurately representing the diel variation may impact mean modelled concentrations.



### 3.5 Potential surface seawater biological drivers of MeSH and DMS

The biological variables monitored (Fig. 2; Table 1) paint a typical picture of the Chl *a*, DMSP<sub>t</sub> and DMS system for this time of year. Chl *a* (which ranged 0.15 – 9.6 µg dm<sup>-3</sup>, Fig. 2) correlated best with the abundance of large nanophytoplankton (15–20 µm) (R<sup>2</sup>=0.70) as well as with the biomass of dinoflagellates (>40 µm) and diatoms (R<sup>2</sup> = 0.90) (Fig. S6 in Rocchi et al., 2025). In other words, the largest contribution to Chl *a* was from large phytoplankton (mainly *Corethron*, heterotrophic dinoflagellates and large cryptomonadales), consistent with previous measurements in Antarctic waters at this time of year (late summer) (Alvain et al., 2008; Deppeler and Davidson, 2017). As a phytoplankton product, DMSP<sub>t</sub> (11–387 nmol dm<sup>-3</sup>; Fig. 3) correlated positively with total Chl *a*, with a stronger correlation to the small size fraction Chl *a* (≤3 µm). Like Chl *a*, DMSP<sub>t</sub> showed lower concentrations in the sea ice zone of the northern Weddell Sea and higher concentrations on the west side of the Antarctic Peninsula. Among phytoplankton, DMSP<sub>t</sub> correlated better with microscopy-counted flagellated cells in the size range of 10–20 µm, and particularly with the pigment-distinguishable cryptomonadales (Table 1), known to be high DMSP producers in polar waters (McParland and Levine, 2019). The peak of DMSP<sub>t</sub> concentration on 21 February (284 nmol dm<sup>-3</sup>) coincided with high abundance of cryptomonadales (2005 cell cm<sup>-3</sup>) at the entrance of the Gerlache Strait. The other DMSP<sub>t</sub> peak on 26 February coincided with a high abundance (387 cell cm<sup>-3</sup>) of large nanophytoplankton. Note that no significant correlation was observed with cell abundances of nanoalgae of the genus *Phaeocystis* (Table 1), despite these being known DMSP producers, particularly in the Southern Ocean (Wang et al., 2015). During the cruise, *Phaeocystis* cell abundances were always less than 550 cells cm<sup>-3</sup>, 100 times lower than earlier in summer (e.g., Vaqué et al., 2025). Overall, most of the DMSP<sub>t</sub> variance was explained by nanophytoplankton abundance (Rocchi et al., 2025), in agreement with previous studies (Belviso et al., 2008; Hopkins et al., 2023; Sheehan and Petrou, 2020).

**Table 1 Pearson correlation coefficient (r) and number of samples (in parentheses) for seawater MeSH, DMS and MeSH:DMS with selected biological parameters measured during the cruise. Values in bold indicate that the two-tailed p value of the correlation is less than 0.01**

|                                                             | Pearson correlation coefficient r |                   |                  |                   |
|-------------------------------------------------------------|-----------------------------------|-------------------|------------------|-------------------|
|                                                             | MeSH                              | DMS               | MeSH:DMS         | DMSP <sub>t</sub> |
| DMSP <sub>t</sub> (nmol dm <sup>-3</sup> )                  | 0.33 (41)                         | 0.23 (68)         | 0.03 (41)        |                   |
| Chl <i>a</i> (total) (µg dm <sup>-3</sup> )                 | 0.02 (41)                         | 0.19 (70)         | 0.27 (41)        | <b>0.56 (68)</b>  |
| Chl <i>a</i> (≤3 µm) (µg dm <sup>-3</sup> )                 | 0.00 (41)                         | 0.00 (70)         | 0.37 (41)        | <b>0.77 (68)</b>  |
| Chl <i>a</i> ( <u>fluo. hourly</u> ) (µg dm <sup>-3</sup> ) | <b>0.49</b> (351)                 | <b>0.49</b> (483) | 0.3 (343)        |                   |
| SST (°C)                                                    | <b>0.56</b> (41)                  | <b>0.41</b> (70)  | 0.07 (41)        | <b>0.28 (68)</b>  |
| SST (°C, hourly)                                            | <b>0.59</b> (351)                 | <b>0.63</b> (483) | 0.22 (351)       |                   |
| Total bacteria (cell cm <sup>-3</sup> )                     | 0.24 (40)                         | 0.00 (68)         | <b>0.41 (40)</b> | <b>-0.17 (67)</b> |
| Cryptomonadales (cell cm <sup>-3</sup> )                    | 0.24 (13)                         | 0.20 (24)         | - 0.20 (13)      | <b>0.72 (24)</b>  |
| Flagellates 10–20 µm (cell cm <sup>-3</sup> )               | - 0.09 (12)                       | 0.47 (21)         | 0.12 (12)        | <b>0.70 (21)</b>  |
| <i>Phaeocystis</i> sp. (cell cm <sup>-3</sup> )             | - 0.07 (13)                       | - 0.19 (24)       | 0.43 (13)        | 0.17 (24)         |

425

In general, biological variables had poor predictive capabilities for MeSH and DMS (Table 1), with correlation coefficients below 0.5. MeSH and DMS showed a similar general pattern to DMSP<sub>t</sub> (Fig. 3b). Yet, covariation was not strong enough to yield significant correlation (Table 1), partly because the large increase in DMSP<sub>t</sub> on 21 February was not accompanied with an increase in DMS or MeSH concentrations, and the two high-DMS episodes in early March were unrelated to the DMSP<sub>t</sub> concentration.

430



Only the DMSP<sub>t</sub> peak on 26 February coincided with elevated concentrations of DMS and MeSH. This may be because MeSH and DMS are produced from the available dissolved DMSP pool, while the total DMSP (DMSP<sub>t</sub>) measured here is contributed mainly by the particulate form (Kiene and Linn, 2006). Hence, peaks of DMSP<sub>t</sub> correspond to snapshot conditions of high abundances of strong DMSP producing phytoplankton, not necessarily accompanied simultaneously by high rates of mortality and dissolved  
435 DMSP release.

As for the MeSH:DMS ratio, it correlated significantly only with bacterial abundance (Table 1). This could be because bacterial catabolism of DMSP produces both MeSH and DMS (Kiene and Linn, 2000; Omori et al., 2025) while algal enzymes produce only DMS (Stefels et al., 2007; Shemi et al., 2023). However, abundance alone is not a quantitative surrogate for bacterial activity  
440 (Hunt et al., 2013). No clue was obtained either as to why the MeSH:DMS ratios were higher in this cruise than in warmer ocean basins with SST > 12°C (Wohl and Simó, 2024). It appears that polar conditions favoured the proportion of MeSH in biological VMS production. Yet, within the polar conditions of the cruise, MeSH and, to lesser extent, DMS significantly correlated positively with SST, with lowest concentrations and SST observed in the sea ice-influenced zone of the Weddell Sea, coinciding with low Chl *a* concentration (Figs 2, 3). Both MeSH and DMS showed a better correlation with hourly measurements of Chl *a* concentration  
445 based on fluorescence, probably because the discrete measurements during the later part of the campaign were only conducted twice a day and likely did not capture the diel variation in Chl *a* concentration (Fig. 2c).

### 3.6 Comparison with Model Results

The average airborne DMS concentration was approximately half the concentration modelled by Wohl et al. (2024) for March over the Southern Ocean in the quadrant of this cruise (0.438–0.557 ppbv in the model). This discrepancy may be due to the larger mean  
450 sea–air flux used in the model for DMS (4.91  $\mu\text{mol m}^{-2} \text{d}^{-1}$ ) compared to the 1.7  $\mu\text{mol m}^{-2} \text{d}^{-1}$  estimated here. The discrepancy between measurement and model was much larger for MeSH, on the order of a factor of ten for air concentrations (136–170 pptv in the model). This could be partly due to the afore mentioned difference in DMS, as Wohl et al. (2024) estimated the seawater MeSH concentration from the climatological seawater DMS (Hulswar et al., 2022). The ratio of seawater MeSH:DMS used in the  
455 model (~0.5) and the mean sea–air MeSH flux in the model (1.28  $\mu\text{mol m}^{-2} \text{d}^{-1}$ ) are similar to the results given here. Tashmim et al. (2025) modelled an annual mean MeSH mixing ratio for 2018 of above 50 pptv for the Southern Ocean, which is about three times larger than what was measured here. **Therefore, the discrepancy in air MeSH concentration between models and observations might be due to an underestimate of the oxidants, particularly OH, in the models, or to as yet unknown MeSH oxidation pathways.**

### 4 Conclusions

460 Overall, this study confirms that the sector of the Southern Ocean around the Antarctic Peninsula is a substantial source of MeSH and DMS to the atmosphere. The distributions of MeSH and DMS in seawater reveal that both compounds are tightly linked, with sporadic decoupling observed during events of high DMS concentrations. Depth profiles confirm that the origin of MeSH, like that of DMS, is biological, but no single biological predictor stood out as controlling DMS and MeSH concentrations, not even the concentration of their main known precursor, DMSP. This illustrates that the transformation of DMSP into its main catabolic  
465 products occurs through a complex web of processes and actors, so that MeSH and DMS concentrations do not only depend on the size of the DMSP pool but on how efficiently it is released and degraded (Simó, 2001). **This hinders attribution of cause and effect relationships between organism abundances and MeSH or DMS concentrations in regional surveys.**



470 Depth profiles and diel variability near the surface suggest that MeSH is more prone to light driven loss than DMS. Air concentrations of MeSH and DMS correlated most of the time, with a much lower MeSH:DMS ratio in air than in seawater due to faster gas-phase oxidation of MeSH compared to DMS. Episodes of proportionally more DMS in air were associated with air masses passing over the sea ice edge before sampling. Diel changes in seawater MeSH concentrations, sea–air fluxes, and atmospheric concentrations, all decreasing during daytime, call for the need to accurately represent the diurnal variability when modelling this compound in the marine environment.

475

This study was part of an emerging effort to characterise the distribution of MeSH in more detail in the ocean, especially the Southern Ocean, and how this relates to biogeochemical processes. This is particularly timely given that MeSH has received comparatively less attention than DMS so far, despite its important role in the Southern Hemisphere. Our measurements show that MeSH and DMS share many similarities due to their common precursor, but MeSH is more reactive in seawater and in air, resulting in a slightly distinct behaviour. The data here is also a useful dataset for model comparison and development.

480

#### **Appendix A. Comparison of Vocus B and Vocus PTR DMS**

Figure A1 shows the comparison between air DMS measured with the Vocus B and measured with the Vocus PTR. The estimated  $\pm 15\%$  uncertainty in both instruments is indicated with error bars. At higher concentrations ( $> 0.5$  ppb) the agreement between the two instruments is excellent as indicated by the 1:1 line. At lower concentrations, the Vocus B concentrations were about 10% lower as indicated by the slope of 0.91 for the least orthogonal distance fit with both x and y data weighted by the uncertainty.

485

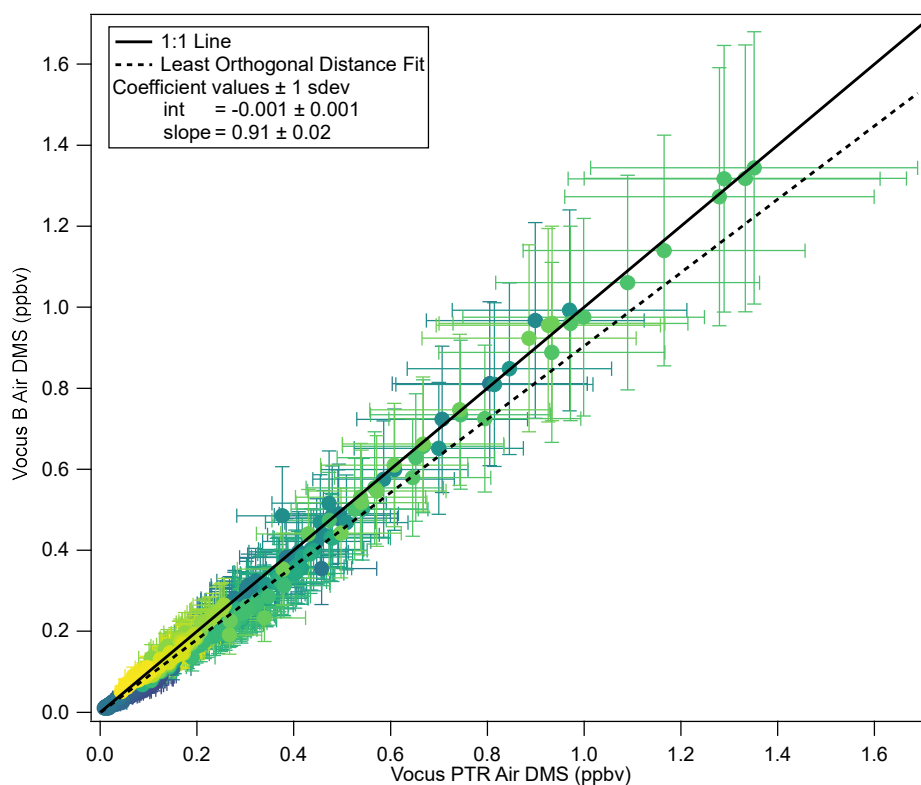

Figure A1. Vocus B air DMS vs Vocus PTR air DMS with a 1:1 line and the least orthogonal distance fit.

#### Data availability

490 Surface underway seawater measurements of MeSH and DMS are available for download at <https://doi.org/10.5281/zenodo.12758981> (Wohl, 2024). Air measurements of MeSH and DMS are available for download at <https://doi.org/10.5281/zenodo.18434929> (Williams, 2026).

#### Author contribution

495 CW, MDO and RS conceptualized and designed the study. CW carried out the measurements and calibrations of MeSH and DMS in seawater. LRW, LLJQ, DCSB and VP carried out the measurements of MeSH and DMS in ambient air with the Vocus PTR and Vocus B. HS and ED contributed to the data analysis of seawater and air MeSH and DMS. GC and KS performed the measurements of ambient air MeSH and DMS with the Quad PTR. AR, DV, ELS, QG, MV, AS, EB and RS collected samples and conducted biogeochemical and biological analyses. YMC and AR processed and analysed flow cytometry and DMSP samples at ICM. CW  
500 and LRW performed the statistical analyses, prepared the figures, and drafted the manuscript. RS acquired funding for the seawater measurements of DMS and MeSH. The cruise was organised and led by MDO. All co-authors contributed to the final version of the manuscript.

#### Competing interests



505 LRW, HS, VP, and FL-H are employed by the vendors of the Vocus PTR and Vocus B. All other authors declare that they have no conflict of interest.

#### Financial support

This project was supported through an Advanced Grant from the European Research Council (ERC-2018-AdG #834162) to RS.  
510 The POLAR CHANGE cruise (PID2019-110288RB-I00) received funding from the Spanish Ministerio de Ciencia e Innovación (MICIN). This study is part of the POLARCSIC platform activities and had the institutional support of the Severo Ochoa Centre of Excellence accreditation (CEX2024-001494-S funded by AEI 10.13039/501100011033) to the ICM-CSIC. Some of CW's time spent on data analysis has been paid for by the UK Natural Environment Research Council (NERC) CARES project (ConstrAining the RoLE of Sulfur in the Earth System, NE/W009307/1). LLJQ thanks the Virtual laboratory for molecular level atmospheric  
515 transformations (VILMA), Research council of Finland (grant # 346372 & 364230). The measurements of air DMS and MeSH were funded by Aerodyne Research.

#### Acknowledgements

We thank the captain and crew of the A33 BIO Hesperides for enabling us to carry out this work and going above and beyond to  
520 make us feel welcome onboard. Thank you very much to Martí Galí Tapias and Matt Baker for helpful discussions around calculating dissolved concentrations in the SFCE.

#### References

- Aggarwal, S., Bansal, P., Wang, Y., Jorga, S., Macgregor, G., Rohner, U., Bannan, T., Salter, M., Zieger, P., Mohr, C., and Lopez-Hilfiker, F.: Identifying key parameters that affect sensitivity of flow tube chemical ionization mass spectrometers, *Atmos. Meas. Tech.*, 18, 4227-4247, 10.5194/amt-18-4227-2025, 2025.  
525
- Alvain, S., Moulin, C., Dandonneau, Y., and Loisel, H.: Seasonal distribution and succession of dominant phytoplankton groups in the global ocean: A satellite view, *Global Biogeochemical Cycles*, 22, n/a-n/a, 10.1029/2007GB003154, 2008.
- Archer, S. D., Ragni, M., Webster, R., Airs, R. L., and Geider, R. J.: Dimethyl sulfoniopropionate and dimethyl sulfide production in response to photoinhibition in *Emiliana huxleyi*, *Limnology and Oceanography*, 55, 1579-1589, 10.4319/lo.2010.55.4.1579,  
530 2010.
- Archer, S. D., Smith, G. C., Nightingale, P. D., Widdicombe, C. E., Tarran, G. A., Rees, A. P., and Burkill, P. H.: Dynamics of particulate dimethylsulphoniopropionate during a Lagrangian experiment in the northern North Sea, *Deep Sea Research Part II: Topical Studies in Oceanography*, 49, 2979-2999, 10.1016/S0967-0645(02)00067-X, 2002.
- Belviso, S., Bopp, L., Mosseri, J., Tedetti, M., Garcia, N., Griffiths, B., Joux, F., Obernosterer, I., Uitz, J., and Veldhuis, M. J. W.:  
535 Effect of natural iron fertilisation on the distribution of DMS and DMSP in the Indian sector of the Southern Ocean, *Deep Sea Research Part II: Topical Studies in Oceanography*, 55, 893-900, 10.1016/j.dsr2.2007.12.040, 2008.
- Bhatti, Y. A., Revell, L. E., Schuddeboom, A. J., McDonald, A. J., Archibald, A. T., Williams, J., Venugopal, A. U., Hardacre, C., and Behrens, E.: The sensitivity of Southern Ocean atmospheric dimethyl sulfide (DMS) to modeled oceanic DMS concentrations and emissions, *Atmospheric Chemistry and Physics*, 23, 15181-15196, 10.5194/acp-23-15181-2023, 2023.



- 540 Björklund, G., Crisponi, G., Nurchi, V. M., Cappai, R., Buha Djordjevic, A., and Aaseth, J.: A Review on Coordination Properties of Thiol-Containing Chelating Agents Towards Mercury, Cadmium, and Lead, *Molecules*, 24, 3247, 10.3390/molecules24183247, 2019.
- Bürgmann, H., Howard, E. C., Ye, W., Sun, F., Sun, S., Napierala, S., and Moran, M. A.: Transcriptional response of *Silicibacter pomeroyi* DSS-3 to dimethylsulfoniopropionate (DMSP), *Environmental Microbiology*, 9, 2742-2755, 10.1111/j.1462-2920.2007.01386.x, 2007.
- 545 Chamba, G., Sellegri, K., Gros, V., Rose, C., Williams, L., Berdalet, E., Vaque, D., Vila, M., Güell-Bujons, Q., Sà, E.-L., Castillo, Y. M., Colomb, A., Pichon, J.-M., Ribeiro, M., Wohl, C., Dall'Osto, M., and Simo, R.: DMS, MeSH and nanoparticles in semi-controlled deck-borne experiments using Antarctic seawaters: on the effect of UV light, *Biogeosciences*, submitted, 2026.
- Chang, Y., Ding, T., Yu, H., Yang, Y., Zhu, L., Liu, X., and Tan, W.: All-in-one: validation and versatile applications of a novel chemical ionization mass spectrometer for simultaneous measurements of volatile organic and inorganic compounds, *Atmos. Meas. Tech.*, 19, 1515-1528, 10.5194/amt-19-1515-2026, 2026.
- 550 Davie-Martin, C. L., Giovannoni, S. J., Behrenfeld, M. J., Penta, W. B., and Halsey, K. H.: Seasonal and Spatial Variability in the Biogenic Production and Consumption of Volatile Organic Compounds (VOCs) by Marine Plankton in the North Atlantic Ocean, *Frontiers in Marine Science*, Volume 7 - 2020, 10.3389/fmars.2020.611870, 2020.
- 555 Deppeler, S. L. and Davidson, A. T.: Southern Ocean Phytoplankton in a Changing Climate, *Frontiers in Marine Science*, 4, 10.3389/fmars.2017.00040, 2017.
- Deschaseaux, E. S. M., Dunne, E., Schulz, K. G., Eyre, B. D., and Harrison, D. P.: The Central Great Barrier Reef as a Net Source of Climatically Relevant Biogenic Volatile Organic Compounds, *Journal of Geophysical Research: Oceans*, 130, e2024JC021192, 10.1029/2024JC021192, 2025.
- 560 Fiddes, S. L., Protat, A., Mallet, M. D., Alexander, S. P., and Woodhouse, M. T.: Southern Ocean cloud and shortwave radiation biases in a nudged climate model simulation: does the model ever get it right?, *Atmospheric Chemistry and Physics*, 22, 14603-14630, 10.5194/acp-22-14603-2022, 2022.
- Flöck, O. R. and Andreae, M. O.: Photochemical and non-photochemical formation and destruction of carbonyl sulfide and methyl mercaptan in ocean waters, *Marine Chemistry*, 54, 11-26, 10.1016/0304-4203(96)00027-8, 1996.
- 565 Fung, K. M., Heald, C. L., Kroll, J. H., Wang, S., Jo, D. S., Gettelman, A., Lu, Z., Liu, X., Zaveri, R. A., Apel, E. C., Blake, D. R., Jimenez, J.-L., Campuzano-Jost, P., Veres, P. R., Bates, T. S., Shilling, J. E., and Zawadowicz, M.: Exploring dimethyl sulfide (DMS) oxidation and implications for global aerosol radiative forcing, *Atmospheric Chemistry and Physics*, 22, 1549-1573, 10.5194/acp-22-1549-2022, 2022.
- Gali, M. and Simó, R.: A meta-analysis of oceanic DMS and DMSP cycling processes: Disentangling the summer paradox, *Global Biogeochemical Cycles*, 29, 496-515, 10.1002/2014GB004940, 2015.
- 570 Galí, M., Devred, E., Pérez, G. L., Kieber, D. J., and Simó, R.: Global Ocean dimethylsulfide photolysis rates quantified with a spectrally and vertically resolved model, *Limnology and Oceanography Letters*, 8, 760-769, <https://doi.org/10.1002/lol2.10342>, 2023.



- Galí, M., Saló, V., Almeda, R., Calbet, A., and Simó, R.: Stimulation of gross dimethylsulfide (DMS) production by solar radiation, 575 *Geophysical Research Letters*, 38, <https://doi.org/10.1029/2011GL048051>, 2011.
- Galí, M., Simó, R., Vila-Costa, M., Ruiz-González, C., Gasol, J. M., and Matrai, P.: Diel patterns of oceanic dimethylsulfide (DMS) cycling: Microbial and physical drivers, *Global Biogeochemical Cycles*, 27, 620-636, 10.1002/gbc.20047, 2013.
- Gorbunov, M. Y., Shirsin, E., Nikonova, E. E., Fadeev, V. V., and Falkowski, P. G.: A multi-spectral fluorescence induction and relaxation (fire) technique for physiological and taxonomic analysis of phytoplankton communities, *Marine Ecology Progress Series*, 644, 1–13, 10.3354/MEPS13358, 2020.
- Gros, V., Bonsang, B., Sarda-Estève, R., Nikolopoulos, A., Metfies, K., Wietz, M., and Peeken, I.: Concentrations of dissolved dimethyl sulfide (DMS), methanethiol and other trace gases in context of microbial communities from the temperate Atlantic to the Arctic Ocean, *Biogeosciences*, 20, 851-867, 10.5194/bg-20-851-2023, 2023.
- He, X. C., Abraham, N. L., Ding, H., Russo, M. R., Grosvenor, D. P., Ge, Y., Wang, X., Jones, A. C., Campuzano-Jost, P., Nault, B., Kupc, A., Blake, D., Jimenez, J. L., Williamson, C. J., Carslaw, K. S., Weber, J., Archibald, A. T., and Gordon, H.: Evaluation of UKESM aerosol size and composition using ATom measurements indicates missing marine aerosol formation mechanisms, *EGUsphere*, 2025, 1-71, 10.5194/egusphere-2025-3700, 2025.
- Henley, S. F., Cavan, E. L., Fawcett, S. E., Kerr, R., Monteiro, T., Sherrell, R. M., Bowie, A. R., Boyd, P. W., Barnes, D. K. A., Schloss, I. R., Marshall, T., Flynn, R., and Smith, S.: Changing Biogeochemistry of the Southern Ocean and Its Ecosystem Implications, *Frontiers in Marine Science*, Volume 7 - 2020, 10.3389/fmars.2020.00581, 2020.
- Hodshire, A. L., Campuzano-Jost, P., Kodros, J. K., Croft, B., Nault, B. A., Schroder, J. C., Jimenez, J. L., and Pierce, J. R.: The potential role of methanesulfonic acid (MSA) in aerosol formation and growth and the associated radiative forcings, *Atmospheric Chemistry and Physics*, 19, 3137-3160, 10.5194/acp-19-3137-2019, 2019.
- Hopkins, F. E., Archer, S. D., Bell, T. G., Suntharalingam, P., and Todd, J. D.: The biogeochemistry of marine dimethylsulfide, 595 *Nature Reviews Earth & Environment*, 4, 361-376, 10.1038/s43017-023-00428-7, 2023.
- Hossain, M., Garland, R. M., and Horowitz, H. M.: Quantifying the impacts of marine aerosols over the southeast Atlantic Ocean using a chemical transport model: implications for aerosol–cloud interactions, *Atmos. Chem. Phys.*, 24, 14123-14143, 10.5194/acp-24-14123-2024, 2024.
- Hsu, S. A., Meindl, E. A., and Gilhousen, D. B.: Determining the Power-Law Wind-Profile Exponent under Near-Neutral Stability 600 Conditions at Sea, *Applied Meteorology*, 33, 1994.
- Hulswar, S., Simó, R., Galí, M., Bell, T. G., Lana, A., Inamdar, S., Halloran, P. R., Manville, G., and Mahajan, A. S.: Third revision of the global surface seawater dimethyl sulfide climatology (DMS-Rev3), *Earth System Science Data*, 14, 2963-2987, 10.5194/essd-14-2963-2022, 2022.
- Hunt, D. E., Lin, Y., Church, M. J., Karl, D. M., Tringe, S. G., Izzo, L. K., and Johnson, Z. I.: Relationship between Abundance and Specific Activity of Bacterioplankton in Open Ocean Surface Waters, *Applied and Environmental Microbiology*, 79, 177-184, doi:10.1128/AEM.02155-12, 2013.



Jacob, L. S. D., Giorio, C., and Archibald, A. T.: Extension, development, and evaluation of the representation of the OH-initiated dimethyl sulfide (DMS) oxidation mechanism in the Master Chemical Mechanism (MCM) v3.3.1 framework, *Atmos. Chem. Phys.*, 24, 3329-3347, 10.5194/acp-24-3329-2024, 2024.

610 Johnson, M. T.: A numerical scheme to calculate temperature and salinity dependent air-water transfer velocities for any gas, *Ocean Science*, 6, 913-932, 10.5194/os-6-913-2010, 2010.

Jones, G. B., Curran, M. A. J., Swan, H. B., Greene, R. M., Griffiths, F. B., and Clementson, L. A.: Influence of different water masses and biological activity on dimethylsulphide and dimethylsulphoniopropionate in the subantarctic zone of the Southern Ocean during ACE 1, *Journal of Geophysical Research: Atmospheres*, 103, 16691-16701, 10.1029/98JD01200, 1998.

615 Kameyama, S., Tanimoto, H., Inomata, S., Suzuki, K., Komatsu, D. D., Hirota, A., Konno, U. T. A., and Tsunogai, U.: Application of PTR-MS to an incubation experiment of the marine diatom *Thalassiosira pseudonana*, *Geochemical Journal*, 45, 355-363, 10.2343/geochemj.1.0127, 2011.

Kettle, A. J., Rhee, T. S., Von Hobe, M., Poulton, A., Aiken, J., and Andreae, M. O.: Assessing the flux of different volatile sulfur gases from the ocean to the atmosphere, *Journal of Geophysical Research Atmospheres*, 106, 12193-12209, 620 10.1029/2000JD900630, 2001.

Kiene, R. P.: Production of methanethiol from dimethylsulfoniopropionate in marine surface waters, *Marine Chemistry*, 54, 69-83, 10.1016/0304-4203(96)00006-0, 1996.

Kiene, R. P. and Linn, L. J.: The fate of dissolved dimethylsulfoniopropionate (DMSP) in seawater: tracer studies using 35S-DMSP, *Geochimica et Cosmochimica Acta*, 64, 2797-2810, 10.1016/S0016-7037(00)00399-9, 2000.

625 Kiene, R. P., Linn, L. J., and Bruton, J. A.: New and important roles for DMSP in marine microbial communities, *Journal of Sea Research*, 43, 209-224, [https://doi.org/10.1016/S1385-1101\(00\)00023-X](https://doi.org/10.1016/S1385-1101(00)00023-X), 2000.

Kiene, R. P., Dacey, J., Rellinger, A. N., and Williams, T. E.: Standing stocks and rates for organic sulfur compounds during summer in the subarctic Northeast Pacific (Version 2), 2021.

Kiene, R. P., Linn, L. J., González, J., Moran, M. A., and Bruton, J. A.: Dimethylsulfoniopropionate and methanethiol are important 630 precursors of methionine and protein-sulfur in marine bacterioplankton, *Applied and Environmental Microbiology*, 65, 4549-4558, 10.1128/AEM.65.10.4549-4558.1999, 1999.

Kilgour, D. B., Jernigan, C. M., Zhou, S., Brito de Azevedo, E., Wang, J., Zawadowicz, M. A., and Bertram, T. H.: Contribution of Speciated Monoterpenes to Secondary Aerosol in the Eastern North Atlantic, *ACS ES&T Air*, 555-566, 10.1021/acsestair.3c00112, 2024.

635 Kinsey, J. D. and Kieber, D. J.: Microwave preservation method for DMSP, DMSO, and acrylate in unfiltered seawater and phytoplankton culture samples, *Limnology and Oceanography: Methods*, 14, 196-209, 10.1002/lom3.10081, 2016.

Kinsey, J. D., Tyssebotn, I. M. B., and Kieber, D. J.: Effect of PAR irradiance intensity on *Phaeocystis antarctica* (Prymnesiophyceae) growth and DMSP, DMSO, and acrylate concentrations, *Journal of Phycology*, 59, 963-979, 10.1111/jpy.13360, 2023.

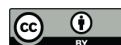

- 640 Landa, M., Burns, A. S., Durham, B. P., Esson, K., Nowinski, B., Sharma, S., Vorobev, A., Nielsen, T., Kiene, R. P., and Moran, M. A.: Sulfur metabolites that facilitate oceanic phytoplankton–bacteria carbon flux, *The ISME Journal*, 13, 2536–2550, 10.1038/s41396-019-0455-3, 2019.
- Lawson, S. J., Law, C. S., Harvey, M. J., Bell, T. G., Walker, C. F., De Bruyn, W. J., and Saltzman, E. S.: Methanethiol, dimethyl sulfide and acetone over biologically productive waters in the southwest Pacific Ocean, *Atmospheric Chemistry and Physics*, 20, 3061–3078, 10.5194/acp-20-3061-2020, 2020.
- 645 Li, C.-X., Chen, K., Sun, X., Liu, L., Xin, M., Liu, X.-L., and Wang, B.-D.: Summer sea ice melting enhances phytoplankton and dimethyl sulfide production, *Limnology and Oceanography*, 69, 2453–2472, 10.1002/lno.12681, 2024.
- Liss, P. S. and Slater, P. G.: Flux of Gases across the Air-Sea Interface, *Nature*, 247, 181–184, 10.1038/247181a0, 1974.
- Mallet, M. D., Humphries, R. S., Fiddes, S. L., Alexander, S. P., Altieri, K., Angot, H., Anilkumar, N., Bartels-Rausch, T., 650 Creamean, J., Dall’Osto, M., Dommergue, A., Frey, M., Henning, S., Lannuzel, D., Lapere, R., Mace, G. G., Mahajan, A. S., McFarquhar, G. M., Meiners, K. M., Miljevic, B., Peeken, I., Protat, A., Schmale, J., Steiner, N., Sellegri, K., Simó, R., Thomas, J. L., Willis, M. D., Winton, V. H. L., and Woodhouse, M. T.: Untangling the influence of Antarctic and Southern Ocean life on clouds, *Elementa: Science of the Anthropocene*, 11, 00130, 10.1525/elementa.2022.00130, 2023.
- Masdeu-Navarro, M., Mangot, J.-F., Xue, L., Cabrera-Brufau, M., Gardner, S. G., Kieber, D. J., González, J. M., and Simó, R.: 655 Spatial and diel patterns of volatile organic compounds, DMSP-derived compounds, and planktonic microorganisms around a tropical scleractinian coral colony, *Frontiers in Marine Science*, 9, 10.3389/fmars.2022.944141, 2022.
- McCoy, D. T., Burrows, S. M., Wood, R., Grosvenor, D. P., Elliott, S. M., Ma, P.-L., Rasch, P. J., and Hartmann, D. L.: Natural aerosols explain seasonal and spatial patterns of Southern Ocean cloud albedo, *Science Advances*, 1, e1500157, 10.1126/sciadv.1500157, 2015.
- 660 Mynard, C., Franklin, E. B., Alroe, J., Somerville, N., Patti, A., Siems, S. T., Williams, A., Mallet, M. D., Humphries, R., and Dunne, E.: Constraining Atmospheric Methanethiol Estimates Over the Southern Ocean, *Geophysical Research Letters*, 52, e2025GL116470, <https://doi.org/10.1029/2025GL116470>, 2025.
- Novak, G. A., Kilgour, D. B., Jernigan, C. M., Vermeuel, M. P., and Bertram, T. H.: Oceanic emissions of dimethyl sulfide and methanethiol and their contribution to sulfur dioxide production in the marine atmosphere, *Atmospheric Chemistry and Physics*, 665 22, 6309–6325, 10.5194/acp-22-6309-2022, 2022.
- Omori, Y., Takahashi, T., Wada, S., Hama, T., Inomata, S., and Tanimoto, H.: Production of Oxygen- and Sulfur-Containing Volatile Organic Compounds by Marine Bacteria From Coastal Seawater, *Journal of Geophysical Research: Biogeosciences*, 130, e2025JG008969, <https://doi.org/10.1029/2025JG008969>, 2025.
- 670 Padaki, V. G., Palmer, E., Jiang, Y., Buchholz, H. H., Kimbrel, J. A., and Halsey, K. H.: Diatom volatile organic compound production is driven by diel metabolism and the cell cycle, *Frontiers in Microbiology*, Volume 16 - 2025, 10.3389/fmicb.2025.1620542, 2025.
- Petrou, K., Kranz, S. A., Trimborn, S., Hassler, C. S., Ameijeiras, S. B., Sackett, O., Ralph, P. J., and Davidson, A. T.: Southern Ocean phytoplankton physiology in a changing climate, *Journal of Plant Physiology*, 203, 135–150, 10.1016/j.jplph.2016.05.004, 2016.



- 675 Read, K. A., Lewis, A. C., Bauguitte, S., Rankin, A. M., Salmon, R. A., Wolff, E. W., Saiz-Lopez, A., Bloss, W. J., Heard, D. E., Lee, J. D., and Plane, J. M. C.: DMS and MSA measurements in the Antarctic Boundary Layer: impact of BrO on MSA production, *Atmospheric Chemistry and Physics*, 8, 2985-2997, 10.5194/acp-8-2985-2008, 2008.
- Rellinger, A. N., Kiene, R. P., del Valle, D. A., Kieber, D. J., Slezak, D., Harada, H., Bisgrove, J., and Brinkley, J.: Occurrence and turnover of DMSP and DMS in deep waters of the Ross Sea, Antarctica, *Deep Sea Research Part I: Oceanographic Research Papers*, 56, 686-702, 10.1016/j.dsr.2008.12.010, 2009.
- 680 Rocchi, A., Fitzsimons, M. F., Akenga, P., Sotomayor, A., Sà, E. L., Güell-Bujons, Q., Vila, M., Castillo, Y. M., Dall'Osto, M., Vaqué, D., Wohl, C., Simó, R., and Berdalet, E.: Distribution of alkylamines in surface waters around the Antarctic Peninsula and Weddell Sea, *Biogeosciences*, 22, 3429-3448, 10.5194/bg-22-3429-2025, 2025.
- Rocco, M., Dunne, E., Salignat, R., Saint-Macary, A., Peltola, M., Barthelmeß, T., Chamba, G., Barr, N., Safi, K., Marriner, A., Deppeler, S., Rose, C., Uitz, J., Harnwell, J., Engel, A., Colomb, A., Saiz-Lopez, A., Harvey, M. J., Law, C. S., and Sellegri, K.: Relating Dimethyl Sulphide and Methanethiol Fluxes to Surface Biota in the South-West Pacific Using Shipboard Air-Sea Interface Tanks, *Journal of Geophysical Research: Atmospheres*, 130, e2024JD041072, 10.1029/2024JD041072, 2025.
- Royer, S. J., Galí, M., Mahajan, A. S., Ross, O. N., Pérez, G. L., Saltzman, E. S., and Simó, R.: A high-resolution time-depth view of dimethylsulphide cycling in the surface sea, *Scientific Reports*, 6, 32325, 10.1038/srep32325, 2016.
- 690 Sander, R.: Compilation of Henry's law constants (version 5.0.0) for water as solvent, *Atmospheric Chemistry and Physics*, 23, 10901-12440, 10.5194/acp-23-10901-2023, 2023.
- Schmale, J., Baccharini, A., Thurnherr, I., Henning, S., Efraim, A., Regayre, L., Bolas, C., Hartmann, M., Welti, A., Lehtipalo, K., Aemisegger, F., Tatzelt, C., Landwehr, S., Modini, R. L., Tummon, F., Johnson, J. S., Harris, N., Schnaiter, M., Toffoli, A., Derkani, M., Bukowiecki, N., Stratmann, F., Dommen, J., Baltensperger, U., Wernli, H., Rosenfeld, D., Gysel-Beer, M., and Carslaw, K. S.: Overview of the Antarctic Circumnavigation Expedition: Study of Preindustrial-like Aerosols and Their Climate Effects (ACE-SPACE), 10.1175/bams-d-18-0187.1, 2019.
- Schoemann, V., Becquevort, S., Stefels, J., Rousseau, V., and Lancelot, C.: *Phaeocystis* blooms in the global ocean and their controlling mechanisms: a review, *Journal of Sea Research*, 53, 43-66, 10.1016/j.seares.2004.01.008, 2005.
- Sheehan, C. E. and Petrou, K.: Dimethylated sulfur production in batch cultures of Southern Ocean phytoplankton, *Biogeochemistry*, 147, 53-69, 10.1007/s10533-019-00628-8, 2020.
- 700 Shemi, A., Ben-Dor, S., Rotkopf, R., Dym, O., and Vardi, A.: Phylogeny and biogeography of the algal DMS-releasing enzyme in the global ocean, *ISME Communications*, 3, 1-9, 10.1038/s43705-023-00280-2, 2023.
- Simó, R.: Production of atmospheric sulfur by oceanic plankton: biogeochemical, ecological and evolutionary links, *Trends in Ecology & Evolution*, 16, 287-294, 10.1016/S0169-5347(01)02152-8, 2001.
- 705 Stefels, J., Steinke, M., Turner, S., Malin, G., and Belviso, S.: Environmental constraints on the production and removal of the climatically active gas dimethylsulphide (DMS) and implications for ecosystem modelling, *Biogeochemistry*, 83, 245-275, 10.1007/s10533-007-9091-5, 2007.
- Sun, J., Todd, J. D., Thrash, J. C., Qian, Y., Qian, M. C., Temperton, B., Guo, J., Fowler, E. K., Aldrich, J. T., Nicora, C. D., Lipton, M. S., Smith, R. D., De Leenheer, P., Payne, S. H., Johnston, A. W. B., Davie-Martin, C. L., Halsey, K. H., and Giovannoni,



- 710 S. J.: The abundant marine bacterium *Pelagibacter* simultaneously catabolizes dimethylsulfoniopropionate to the gases dimethyl sulfide and methanethiol, *Nature Microbiology*, 1, 16065, [10.1038/nmicrobiol.2016.65](https://doi.org/10.1038/nmicrobiol.2016.65), 2016.
- Tashmim, L., Porter, W. C., Bertram, T. H., Kilgour, D. B., and Rollins, A.: Global Impacts of Marine Methanethiol Emissions and Chemistry in the Atmosphere, *Environmental Science & Technology*, 59, 20421-20428, [10.1021/acs.est.5c02019](https://doi.org/10.1021/acs.est.5c02019), 2025.
- Teng, Z.-J., Qin, Q.-L., Zhang, W., Li, J., Fu, H.-H., Wang, P., Lan, M., Luo, G., He, J., McMinn, A., Wang, M., Chen, X.-L.,  
715 Zhang, Y.-Z., Chen, Y., and Li, C.-Y.: Biogeographic traits of dimethyl sulfide and dimethylsulfoniopropionate cycling in polar oceans, *Microbiome*, 9, 207, [10.1186/s40168-021-01153-3](https://doi.org/10.1186/s40168-021-01153-3), 2021.
- Ulshöfer, V. S., Flöck, O. R., Uher, G., and Andreae, M. O.: Photochemical production and air-sea exchange of carbonyl sulfide in the eastern Mediterranean Sea, *Marine Chemistry*, 53, 25-39, [10.1016/0304-4203\(96\)00010-2](https://doi.org/10.1016/0304-4203(96)00010-2), 1996.
- Vaqué, D., Berdalet, E., Sotomayor-García, A., Estrada, M., Cabrera-Brufau, M., Masdeu-Navarro, M., Rocchi, A., López-Alforja,  
720 X., Vila, M., Marrasé, C., Simó, R., Dall'osto, M., and Sala, M. M.: Assessing the relationship between viruses and protists and their role in dimethylsulphoniopropionate release in Antarctic surface microlayers, *Antarctic Science*, 37, 265-277, [10.1017/S0954102025100205](https://doi.org/10.1017/S0954102025100205), 2025.
- Wang, S., Elliott, S., Maltrud, M., and Cameron-Smith, P.: Influence of explicit *Phaeocystis* parameterizations on the global distribution of marine dimethyl sulfide, *Journal of Geophysical Research: Biogeosciences*, 120, 2158-2177,  
725 [10.1002/2015JG003017](https://doi.org/10.1002/2015JG003017), 2015.
- Wanninkhof, R.: Relationship between wind speed and gas exchange over the ocean revisited, *Limnology and Oceanography: Methods*, 12, 351-362, <https://doi.org/10.4319/lom.2014.12.351>, 2014.
- Webb, A. L., van Leeuwe, M. A., den Os, D., Meredith, M. P., J. Venables, H., and Stefels, J.: Extreme spikes in DMS flux double estimates of biogenic sulfur export from the Antarctic coastal zone to the atmosphere, *Scientific Reports*, 9, 1-11, [10.1038/s41598-019-38714-4](https://doi.org/10.1038/s41598-019-38714-4), 2019.  
730
- Williams, L.: Measurements of methanethiol (MeSH) and dimethyl sulfide (DMS) in air during POLAR-CHANGE Antarctic research cruise 2023 on board the BIO Hesperides, <https://doi.org/10.5281/zenodo.18434929>, 2026.
- Wohl, C.: Measurements of Methanethiol (MeSH) and dimethyl sulfide (DMS) in surface seawater during POLAR-CHANGE Antarctic expedition 2023 on board the BIO Hesperides., <https://doi.org/10.5281/zenodo.12758981>, 2024.
- 735 Wohl, C. and Simó, R.: Measurements of methanethiol (MeSH) and dimethyl sulfide (DMS) in surface seawater during 2022 at the monthly sampling observatory of Blanes Bay Microbial Observatory, 2024.
- Wohl, C., Forster, G. L., Edwards, P. M., Suntharalingam, P., and Oram, D. E.: Methanethiol Abundance and Oxidation in a Polluted Marine Atmosphere, *Geophysical Research Letters*, 52, e2025GL114929, [10.1029/2025GL114929](https://doi.org/10.1029/2025GL114929), 2025.
- Wohl, C., Güell-Bujons, Q., Castillo, Y. M., Calbet, A., and Simó, R.: Volatile Organic Compounds Released by *Oxyrrhis marina*  
740 Grazing on *Isochrysis galbana*, *Oceans*, 4, 151-169, <https://doi.org/10.3390/oceans4020011>, 2023a.
- Wohl, C., Brown, I., Kitidis, V., Jones, A. E., Sturges, W. T., Nightingale, P. D., and Yang, M.: Underway seawater and atmospheric measurements of volatile organic compounds in the Southern Ocean, *Biogeosciences*, 17, 2593-2619, <https://doi.org/10.5194/bg-17-2593-2020>, 2020.



- 745 Wohl, C., Capelle, D., Jones, A., Sturges, W. T., Nightingale, P. D., Else, B. G. T., and Yang, M.: Segmented flow coil equilibrator coupled to a Proton Transfer Reaction Mass Spectrometer for measurements of a broad range of Volatile Organic Compounds in seawater, *Ocean Science*, 15, 1-37, 10.5194/os-2019-5, 2019.
- Wohl, C., Jones, A. E., Sturges, W. T., Nightingale, P. D., Else, B., Butterworth, B. J., and Yang, M.: Sea ice concentration impacts dissolved organic gases in the Canadian Arctic, *Biogeosciences*, 19, 1-36, 10.5194/bg-2021-252, 2022.
- 750 Wohl, C., Li, Q., Cuevas, C. A., Fernández, R. P., Yang, M., Saiz-Lopez, A., and Simó, R.: Marine biogenic emissions of benzene and toluene and their contribution to secondary organic aerosols over the polar oceans, *Science Advances*, 9, 1-12, 10.1126/sciadv.add9031, 2023b.
- Wohl, C., Villamayor, J., Galí, M., Mahajan, A. S., Fernández, R. P., Cuevas, C. A., Bossolasco, A., Li, Q., Kettle, A. J., Williams, T., Sarda-Esteve, R., Gros, V., Simó, R., and Saiz-Lopez, A.: Marine emissions of methanethiol increase aerosol cooling in the Southern Ocean, *Science Advances*, 10, eadq2465, 10.1126/sciadv.adq2465, 2024.
- 755 Wolfe, G. M., Nicely, J. M., St. Clair, J. M., Hanisco, T. F., Liao, J., Oman, L. D., Brune, W. B., Miller, D., Thames, A., González Abad, G., Ryerson, T. B., Thompson, C. R., Peischl, J., McKain, K., Sweeney, C., Wennberg, P. O., Kim, M., Crouse, J. D., Hall, S. R., Ullmann, K., Diskin, G., Bui, P., Chang, C., and Dean-Day, J.: Mapping hydroxyl variability throughout the global remote troposphere via synthesis of airborne and satellite formaldehyde observations, *Proceedings of the National Academy of Sciences*, 116, 11171-11180, doi:10.1073/pnas.1821661116, 2019.
- 760 Yang, M., Blomquist, B. W., Fairall, C. W., Archer, S. D., and Huebert, B. J.: Air-sea exchange of dimethylsulfide in the Southern Ocean: Measurements from SO GasEx compared to temperate and tropical regions, *Journal of Geophysical Research: Oceans*, 116, 10.1029/2010JC006526, 2011.
- Yang, M., Archer, S. D., Blomquist, B. W., Ho, D. T., Lance, V. P., and Torres, R. J.: Lagrangian evolution of DMS during the Southern Ocean gas exchange experiment: The effects of vertical mixing and biological community shift, *Journal of Geophysical Research: Oceans*, 118, 6774-6790, 10.1002/2013JC009329, 2013a.
- 765 Yang, M., Nightingale, P. D., Beale, R., Liss, P. S., Blomquist, B. W., and Fairall, C. W.: Atmospheric deposition of methanol over the Atlantic Ocean, *Proceedings of the National Academy of Sciences of the United States of America*, 110, 20034-20039, 10.1073/pnas.1317840110, 2013b.
- Zhang, M., Park, K.-T., Yan, J., Park, K., Wu, Y., Jang, E., Gao, W., Tan, G., Wang, J., and Chen, L.: Atmospheric dimethyl sulfide and its significant influence on the sea-to-air flux calculation over the Southern Ocean, *Progress in Oceanography*, 186, 102392, 10.1016/j.pocean.2020.102392, 2020.
- 770
